# Supplementary material for: Lifestyles and determinants of perceived health in Italian grown-up/adult congenital heart patients: a cross-sectional and pan-national survey
Source: PubMed Central journal article supplement — BMJ Open. 2019 Oct 18;9(10):e030917. doi: 10.1136/bmjopen-2019-030917 (PMC6803081; doi:10.1136/bmjopen-2019-030917), 2019-10-18
Supplement: bmjopen-2019-030917.draft_revisions.pdf [file bmjopen-2019-030917.draft_revisions.pdf]

# BMJ Open

BMJ Open is committed to open peer review. As part of this commitment we make the peer review history of every article we publish publicly available.

When an article is published we post the peer reviewers' comments and the authors' responses online. We also post the versions of the paper that were used during peer review. These are the versions that the peer review comments apply to.

The versions of the paper that follow are the versions that were submitted during the peer review process. They are not the versions of record or the final published versions. They should not be cited or distributed as the published version of this manuscript.

BMJ Open is an open access journal and the full, final, typeset and author-corrected version of record of the manuscript is available on our site with no access controls, subscription charges or pay-per-view fees (<http://bmjopen.bmj.com>).

If you have any questions on BMJ Open's open peer review process please email [info.bmjopen@bmj.com](mailto:info.bmjopen@bmj.com)

# BMJ Open

## Lifestyles and determinants of perceived health in Italian Grown-up/Adult congenital heart patients: A national survey

|                               |                                                                                                                                                                                                                                                                           |
|-------------------------------|---------------------------------------------------------------------------------------------------------------------------------------------------------------------------------------------------------------------------------------------------------------------------|
| Journal:                      | <i>BMJ Open</i>                                                                                                                                                                                                                                                           |
| Manuscript ID                 | bmjopen-2019-030917                                                                                                                                                                                                                                                       |
| Article Type:                 | Research                                                                                                                                                                                                                                                                  |
| Date Submitted by the Author: | 09-Apr-2019                                                                                                                                                                                                                                                               |
| Complete List of Authors:     | Dellafiore, Federica; IRCCS Policlinico San Donato<br>Arrigoni, Cristina; University of Pavia<br>caruso, rosario; IRCCS Policlinico San Donato,<br>Flocco, Serena; IRCCS Policlinico San Donato<br>Giamberti, Alessandro<br>Chessa, Massimo; IRCCS Policlinico San Donato |
| Keywords:                     | Congenital heart disease < CARDIOLOGY, Adult cardiology < CARDIOLOGY, MENTAL HEALTH                                                                                                                                                                                       |
|                               |                                                                                                                                                                                                                                                                           |

SCHOLARONE™  
Manuscripts

*Title***Lifestyles and determinants of perceived health in Italian Grown-up/Adult congenital heart patients: A national survey***Authors*

Federica DELLAFIORÉ<sup>1</sup>, PhD, RN Cristina ARRIGONI<sup>2</sup>, RN, MSc; Rosario CARUSO<sup>1</sup>, PhD, RN; Serena Francesca FLOCCO<sup>3</sup>, RN; Alessandro GIAMBERTI<sup>3</sup>, MD; Massimo CHESSA<sup>3</sup>, MD, PhD

*Affiliations*

1. Health Professions Research and Development Unit, IRCCS Policlinico San Donato, San Donato Milanese, Milan, Italy
2. Department of Public Health, Experimental and Forensic Medicine, Section of Hygiene, University of Pavia, Pavia, Italy
3. Pediatric and Adult Congenital Heart Disease Center, IRCCS Policlinico San Donato, San Donato Milanese, Milan, Italy

**Corresponding author**

Rosario Caruso, PhD, RN  
Head of Health Professions Research and Development Unit  
IRCCS Policlinico San Donato  
Via Agadir, 20-24  
20097 San Donato Milanese, Italy  
Phone: +39 0252774940  
Email: [rosario.caruso@unimi.it](mailto:rosario.caruso@unimi.it)

**Acknowledgements.** We wish to thank all the study participants, patient advisers and the ‘Associazione Italiana Cardiopatici Congeniti Adulti’ (AICCA).

## Abstract

**Objectives:** This study was aimed to provide the first Italian epidemiological description of lifestyles in Grown-up/Adult congenital heart (GUCH/ACHD) population, identifying the determinants of poor perceived health status. **Design:** Cross-sectional pan-national survey. **Setting:** Italian GUCH/ACHD patients who were members of the Italian Association of GUCH/ACHD patients. **Primary and secondary outcome measures:** Lifestyles description through an *ad hoc* developed questionnaire, and health perception (i.e. mental and physical health perception) through SF-12 questionnaire. **Results:** The sample encompassed 629 patients. Many investigated lifestyles in GUCH/ACHD were found similar to the ones of the general population, with the exception of the smoking habits, which were lower. The odds of inadequate perception of physical health increased by more than two times in patients under antiarrhythmic therapies (OR adjusted = 2.045; 95% CI = 1.201-3.479; P = 0.008), more than 1.5 times in patients under anticoagulants (OR adjusted = 1.638; 95% CI = 1.038-2.585; P = 0.034), and roughly 1.7 times in patients treated with antiplatelet (OR adjusted = 1.743; 95% CI = 1.024-2.966; P = 0.041). The odds of inadequate perception of mental health increased by 1.7 time every year of aging (OR adjusted = 1.017; 95% CI = 1.002-1.032; P = 0.025). **Conclusion:** A particular attention should be given by the increasing psychological needs given by the aging of those patients. More research are needed to identify associations between lifestyles and clinical outcomes.

**Keywords:** Congenital heart disease; Grown-up congenital heart; Health perception; Lifestyles; Survey.

1  
2  
3  
4  
5  
6  
7  
8  
9  
10  
11  
12  
13  
14  
15  
16  
17  
18  
19  
20  
21  
22  
23  
24  
25  
26  
27  
28  
29  
30  
31  
32  
33  
34  
35  
36  
37  
38  
39  
40  
41  
42  
43  
44  
45  
46  
47  
48  
49  
50  
51  
52  
53  
54  
55  
56  
57  
58  
59  
60

## Strengths and limitations of this study

- The determinants of perceived health status among GUCH/ACHD remain poorly described worldwide and in the specific of the Italian context
- This Italian national survey aimed to provide the first Italian epidemiological description of lifestyles in GUCH/ACHD population, identifying the determinants of poor perceived health status
- Many lifestyles among GUCH/ACHD are similar to the ones of general population, even for illicit drug consumption behaviors, and the aging is particularly associated to increased psychological needs
- The cross-sectional data collection implies caution in the generalization of the results, as the trajectory over time of life styles was not described in this study
- The self-report approach in the clinical information collection suggested caution in identifying the actual clinical condition of the responders; accordingly, the match between perceived health status and clinical aspects requires more in-depth investigations.

## Introduction

Roughly the 85% of children with congenital heart disease (CHD) becomes adult, representing the population of grown-up/adult patients with congenital heart disease (GUCH/ACHD).<sup>1</sup> More precisely, the rate of GUCH/ACHD has been growing steadily, even if accurate data on the size and characteristics of this population are still lacking.<sup>2</sup> Even if the large variety of CHD and their peculiar clinical problems require specific focus to improve GUCH/ACHD clinical condition, this population shares also a number of important communalities mainly related to the modifiable risk factors of clinical status decline. Among these modifiable risk factors, the lifestyles play a pivotal role in improving the overall health conditions among GUCH/ACHD.<sup>3</sup> Further, the description in those patients of the socio-demographic and clinical determinants of their perceived health status has a paramount role to frame a comprehensive understanding of the actual weaknesses in the educational plans and follow-ups. Specific interventions on the determinants of poor perceived health status could be useful to achieve best outcomes in GUCH/ACHD population, as previously described for other chronic conditions, such as diabetes and acquired heart diseases.<sup>4-7</sup>

So far, the determinants of perceived health status among GUCH/ACHD remain poor described worldwide, despite their possible influence on the overall adherence to the follow-ups, and consequently, on outcomes.<sup>8</sup> As per Italy, both lifestyles and determinants of perceived health status among GUCH/ACHD have not been described previously on large samples, undermining the possibility to plan mid- and long-term strategies for those patients who report poor perceived health or inadequate lifestyles. For these reasons, this study was aimed to provide the first Italian epidemiological description of lifestyles in GUCH/ACHD population, identifying the determinants of poor perceived health status.

## Material and methods

### *Design, study population and data collection*

This cross-sectional survey was promoted by an Italian GUCH/ACHD center, supported by the Italian Association of GUCH/ACHD (AICCA). Study design and reporting were fit the ‘STrengthening the Reporting of OBservational studies in Epidemiology’ (STROBE) checklist (Supplementary file). Data were collected through the list of contacts of AICCA, between March and October 2017. More precisely, data collection was carried out using a computer/mobile assisted web interviewing survey, sampling participants using the repertory of contacts of AICCA, stratified to reflect the geo-graphical distribution of the population by macro-area (i.e. Northern, Central and Southern Italy). The development of the questionnaire for this study was based on a previous survey of the Italian National Institute of Public Health on population with chronic diseases,<sup>9</sup> adapted using a process of face and content validity to detect the peculiarities of GUCH/ACHD. Accordingly, the questionnaire validation required the involvement of a multi-disciplinary panel of experts to ascertain the questionnaire face and content validity. Precisely, face validity explored the panelists’ understanding of each item and their comments about the overall concept they purport to measure, being assessed through open-ended questions to the panelists. Conversely, content validity referred to the ‘quantitative’ agreement among panelists regarding how pertinent is each item in relation to the aim of its measurement. Once obtained satisfactory indices of content validity, the questionnaire was preliminary tested in a small group of six patients to evaluate the clarity of each item. Both face/content validity and the pilot testing required some minor amendments to the items’ wording. The final questionnaire was available and validated for this study in January 2017. The survey required roughly thirty minutes for its compilation, and each respondent received no compensation for this study.

According to the study protocol (approved by the Ethical Committee of the center of reference, prot. N. 111/INT/2016), all patients were informed on the study aim, and they provided consent flagging an electronic form, whereas it was considered implicit due to their voluntarily and anonymously filling of the questionnaire.

### *Measurements*

The online survey collected the main socio-demographic and clinical characteristics of GUCH/ACHD, the lifestyles, and the perceived health status.

**Table 1** synthesized the measurements of this study. Specifically, socio-demographic and clinical characteristics were sex, age, family composition, working role, educational background, provenience, body mass index (BMI), and therapeutic plan. The investigated lifestyles referred to dietary habits, substances usage or abuse (e.g. smoking and drugs), physical and sexual activities. Conversely, the perceived health status was assessed using SF-12.<sup>10</sup> Notably, SF-12 has been successfully developed as a shorter version of SF-36 in nine European countries, showing a good validity in measuring the physical and mental components of health.<sup>10</sup> Thus, these components were respectively physical component summary (PCS) and mental component summary (MCS). Both PCS and MCS have to be scored to 0-100 using the procedure indicated by the authors of reference, where higher values indicate a better health perception.<sup>10</sup> Further, it is possible to dichotomize the scores in adequate versus inadequate perception of health, if we consider keep into account the indications provided by Utah Health Status survey to establish the cut-off points adjusted for the age of the responders.<sup>11</sup>

----Please, insert Table 1 ----

### *Statistical analysis*

We calculated the response rate considering the invitations send to the contacts provided by AICCA. All the collected variables were preliminary checked for possible missing, outliers or errors using the analysis of their frequency distribution. Categorical variables were described using frequency and percentage, while quantitative variables were assessed for the normality using skewness and kurtosis analysis, followed by Shapiro-Wilk test. According to quantitative variables distribution, we used mean  $\pm$  standard deviation (SD) or median and interquartile range (IQR) to describe these variables. The univariate analysis was based on multiple comparisons of the lifestyles, ongoing treatments, PCS, and MCS between the sub-groups defined by the socio-



1  
2  
3 demographic characteristics. According to the nature of each variable, the comparisons were  
4  
5 performed using the following possible tests:  $\chi^2$  test or Fisher exact test (when appropriate), Mann–  
6  
7 Whitney U test or Kruskal–Wallis H test (for non-normally distributed variables), t-test or one-way  
8  
9 ANOVA (for normally distributed variables). Variables showing significant differences were  
10  
11 evaluated to be used as predictors of inadequate PCS and MCS, dichotomizing these scores using  
12  
13 the cut-offs indicated by Utah Health Status survey to depict the (in)adequate health perception  
14  
15 adjusted by age.<sup>11</sup> More precisely, considering that it was not known a priori which independent  
16  
17 variable should be included in a model, we followed recent recommendations for variable selection  
18  
19 balancing the significance criteria of the univariate analysis, the information criteria (theoretical  
20  
21 important covariates), and likelihood analysis.<sup>12</sup> Then, PCS and MCS were used as dichotomous  
22  
23 outcomes in two logistic regression (LR) models. LR models were assessed for the possible  
24  
25 collinearity among the independent variable, checking the strength of their bivariate associations  
26  
27 which should not be superior to 0.45.<sup>13</sup> Maximum likelihood estimation was used to determine the  
28  
29 unknown LR model parameters through the generalized linear model function of R, while the  
30  
31 goodness of fit using the Hosmer-Lemeshow Test (non-significant P indicate a good fit), and the  
32  
33 Nagelkerke's pseudo- $R^2$ . The independent variables were entered into the models simultaneously to  
34  
35 control for each other. Significance levels were set using  $\alpha = 5\%$ . Overall, statistical analysis were  
36  
37 run through Statistical Package for the Social Sciences (SPSS) version 22 (IBM Corporation) and R  
38  
39 Statistical Package (R Foundation for Statistical Computing).

#### 46 *Patient and public involvement*

47  
48 Patients and the public were not involved in the design of this research. However, the  
49  
50 participants and more broadly the public will be informed of the result of the survey through the  
51  
52 network of AICCA. Accordingly, the authors will use the support of AICCA to disseminate the  
53  
54 study results.  
55  
56  
57  
58  
59  
60

## Results

The response rate was 89.7% (626 responses on the 698 invitations). **Table 2** shows the socio-demographic characteristics, lifestyles, ongoing treatments and health perception.

Roughly one patient every five (n=106; 18.1%) declared to be low adherent to the ongoing medical treatment. Particularly, patients were mainly treated using anticoagulants (n=162; 25.9%), antiarrhythmic drugs (n=121; 19.3%), diuretics (n=104; 16.6%), antiplatelet therapy (n=87; 13.9%), antihypertensive drugs (n=81; 12.9%), and dietary supplements (n=160; 25.6%).

The score of physical health (PCS12) had a mean (SD) equal to  $48.69 \pm 8.96$ , while mental health (MCS12) was lower ( $45.56 \pm 10.99$ ). Overall, the adequate scores of physical and mental health were respectively 53.6% (n=337) and 63.8% (n=401).

----Please, insert Table 2 ----

As **Table 3** shows, the odds of inadequate perception of physical health increased by more than two times in patients under antiarrhythmic therapies (OR adjusted = 2.045; 95% CI = 1.201-3.479; P = 0.008), more than 1.5 times in patients under anticoagulants (OR adjusted = 1.638; 95% CI = 1.038-2.585; P = 0.034), and roughly 1.7 times in patients treated with antiplatelet (OR adjusted = 1.743; 95% CI = 1.024-2.966; P = 0.041). Conversely, as per **Table 4**, the odds of inadequate perception of mental health increased by 1.7 time every year of aging (OR adjusted = 1.017; 95% CI = 1.002-1.032; P = 0.025).

----Please, insert Table 3 ----

----Please, insert Table 4 ----

## Discussion

This study represents the first overview in Italy of lifestyles in an ACHD/GUCH population, identifying determinants of poor perceived health status. Our results are strategic considering that they allow a comparison between lifestyles of general population and the ones related to ACHD/GUCH patients. These possible comparisons are particularly worthy, considering that the

1  
2  
3 majority of patients born with CHD are expected to survive into adulthood, being exposed to the  
4  
5 general risks of inadequate lifestyles (i.e. modifiable cardiovascular risks) in maintaining a healthy  
6  
7 status.<sup>14</sup> Further, this study intercepts the most critical determinants associated to poorer physical  
8  
9 and mental health, allowing to boost the attention for patients that present those determinants.  
10  
11

12 Our sample reported an adequate BMI, which is slightly lower than previous epidemiological  
13  
14 self-report BMI assessment in Italian general population aged between 30-45 years.<sup>15</sup> The other socio-  
15  
16 demographic characteristics are consistent with data on general population.<sup>15,16</sup> Among lifestyles, the  
17  
18 rate of smokers among GUCH/ACHD appears to be encouragingly lower than the one reported in  
19  
20 general population (10.4% versus 21.4%),<sup>17</sup> and the one shown by a recent description in Malta.<sup>18</sup>  
21  
22 This result could be related by the high sensibility of clinicians in providing regular advices and  
23  
24 education against smoking. However, cannabis consumption appears to be consistent and slightly  
25  
26 higher than the rate of self-report assessed consumption in general population.<sup>19</sup> This result is also in  
27  
28 line with previous evidence coming from younger adults with CHD, where the behaviors were  
29  
30 described as influenced by peer-relationships more than awareness on the one's clinical condition.<sup>20</sup>  
31  
32 This aspect should be addressed by an increasing attention by clinicians towards the illicit drugs  
33  
34 consumption, addressing a campaign of information for GUCH/ACHD population, highlighting the  
35  
36 risk of increased systolic blood pressure, orthostatic hypotension, and a greater risk of ischemic  
37  
38 stroke.<sup>21</sup>  
39  
40  
41  
42  
43

44 An unexpected result was related to the rates of reported physical activities, which were  
45  
46 consistent with the ones described in the general population.<sup>22</sup> Our initial expectation was to find  
47  
48 lower rate of physical activities in GUCH/ACHD patients, due to the clinicians, in the past, used to  
49  
50 restrict activity for those patients because of concerns that increased activity might be risky.<sup>23</sup> Over  
51  
52 the last ten years, the recommendations coming from a consensus of an international expert panel  
53  
54 endorsed by the European Society of Cardiology (ESC) encourage regular exercise at in all patients  
55  
56 with CHD, even if these recommendations are mainly based on expert opinion, as there is still low  
57  
58 evidence on the effects of exercise training.<sup>24</sup> Our results confirm the shifting of paradigm from the  
59  
60

1  
2  
3 restriction of physical activities to its support in educational advices. Accordingly, the steady  
4 progresses in diagnostics for GUCH/ACHD give the perspective to emphasizing the life-long benefits  
5 of regular physical activity on general health also in complex CHD (adequately adherent to the  
6 follow-ups).<sup>25</sup>  
7  
8  
9  
10

11  
12 In our study, the ongoing medical treatment was the sole source to ascertain objectively the  
13 clinical condition of the enrolled patients. Our results profiled the patients with higher risk of  
14 inadequate physical and mental health, considering their ongoing treatments. Patients treated by  
15 antiarrhythmic therapies, anticoagulants, and antiplatelet should be supported more in preventing  
16 inadequate perception of physical health, in relations to the ones' health status. While mental health  
17 worsens with the aging. This could be related to the previously described fear of aging of many  
18 GUCH/ACHD, enhanced by a sense of uncertainty.<sup>26</sup> In other words, this implies that psychological  
19 needs of GUCH/ACHD population increase with aging.  
20  
21  
22  
23  
24  
25  
26  
27  
28  
29

### 30 *Limitations*

31  
32 The findings in this study are subject to some important limitations. Firstly, the impossibility  
33 to collect reliable clinical data (e.g. CHD classification, diagnostics) undermines the possibility of  
34 solid inferential associations between lifestyles (behaviors) and clinical outcomes. For this reason,  
35 this study should mainly provide descriptive information to frame new knowledge on lifestyles in  
36 Italian GUCH/ACHD population. Another limitation was given by the possibility of an  
37 underestimation of the levels of risky behaviors and an overestimation of the levels of healthy  
38 behaviors, due to the possibility of the social desirability effect in answering. However, the choice to  
39 collected data anonymously should limit the probability of the social desirability effect. The strengths  
40 of the study are mainly related to the fact that patients roughly represent equally Northern, Central,  
41 and Southern Italy, and by the prudent approach used to analyze the data.  
42  
43  
44  
45  
46  
47  
48  
49  
50  
51  
52  
53  
54

### 55 **Conclusions**

56  
57 So far, this study represents the first Italian description of lifestyles in GUCH/ACHD  
58 population. We identified a number of similarities and some differences with the Italian general  
59  
60

1  
2  
3 population. Clinicians should address the issue of illicit drug consumption (especially marijuana)  
4 more deeply, considering our findings. Further, a particular attention should be given by the  
5 increasing psychological needs given by the aging of those patients. More research are needed to  
6 identify associations between lifestyles and clinical outcomes, providing more details for  
7 homogenous sub-group stratifications considering the clinical information, such as the CHD  
8 classification.  
9  
10  
11  
12  
13  
14  
15  
16  
17  
18

### 19 **Author's contributions statement**

20  
21 RC, FD, CA, SFF, AG, and MC: conception and design, FD, SFF, AG and MC was particularly  
22 involved in the acquisition of data, RC and CA in analysis and interpretation of data; RC, FD, CA,  
23 SFF, AG, and MC have substantially contributed in drafting the manuscript and in providing critical  
24 revision of important intellectual content. Each author gave their final approval of the version to be  
25 published. Each author should have participated sufficiently in the work to take public responsibility  
26 for appropriate portions of the content.  
27  
28  
29  
30  
31  
32  
33  
34  
35  
36

### 37 **Competing interests**

38  
39 The authors declare no conflict of interest.  
40  
41  
42

### 43 **Funding**

44  
45 This research was partially supported by 'Ricerca Corrente' funding from Italian Ministry of Health  
46 to IRCCS Policlinico San Donato.  
47  
48  
49

### 50 **Data sharing statement**

51  
52 We intend to make data freely available the data upon request to the corresponding author  
53 (rosario.caruso@unimi.it).  
54  
55  
56  
57  
58  
59  
60

## References

1. Baumgartner H, Bonhoeffer P, De Groot NMS, et al. ESC Guidelines for the management of grown-up congenital heart disease (new version 2010): The Task Force on the Management of Grown-up Congenital Heart Disease of the European Society of Cardiology (ESC). *Eur Heart J*. 2010;31(23):2915-2957. doi:10.1093/eurheartj/ehq249.
2. van der Linde D, Konings EEM, Slager MA, et al. Birth Prevalence of Congenital Heart Disease Worldwide: A Systematic Review and Meta-Analysis. *J Am Coll Cardiol*. 2011;58(21):2241-2247. doi:10.1016/J.JACC.2011.08.025.
3. Flocco SF, Caruso R, Dellafiore F, et al. [The effect of the transition care model on health perception among adolescents with congenital heart disease: a quasi-experimental study]. *G Ital Cardiol*. 2018;19(6):386-393. doi:10.1714/2922.29372.
4. Dellafiore F, Conte G, Baroni I, et al. Gender differences in heart failure self-care behaviors: do we know enough? *Minerva Med*. 2018;109(5):401-403. doi:10.23736/S0026-4806.18.05579-9.
5. Caruso R, Arrigoni C, Magon A, et al. Health determinants in italian type 2 diabetes Mellitus (T2DM) patients: A critical gender differences analysis. *J Res Genet Stud*. 2017;7(2). doi:10.22381/JRGS7220176.
6. Dellafiore F, Arrigoni C, Pittella F, Conte G, Magon A, Caruso R. Paradox of self-care gender differences among Italian patients with chronic heart failure: findings from a real-world cross-sectional study. *BMJ Open*. 2018;8(9):e021966. doi:10.1136/bmjopen-2018-021966.
7. Caruso R, Magon A, Baroni I, et al. Health literacy in type 2 diabetes patients: a systematic review of systematic reviews. *Acta Diabetol*. 2018;55(1):1-12. doi:10.1007/s00592-017-1071-1.
8. Dontje ML, Feenstra M, de Greef MHG, Nieuwland W, Hoendermis ES. Are Grown-ups with Congenital Heart Disease Willing to Participate in an Exercise Program? *Congenit*

1  
2  
3  
4  
5  
6  
7  
8  
9  
10  
11  
12  
13  
14  
15  
16  
17  
18  
19  
20  
21  
22  
23  
24  
25  
26  
27  
28  
29  
30  
31  
32  
33  
34  
35  
36  
37  
38  
39  
40  
41  
42  
43  
44  
45  
46  
47  
48  
49  
50  
51  
52  
53  
54  
55  
56  
57  
58  
59  
60

*Heart Dis.* 2014;9(1):38-44. doi:10.1111/chd.12069.

9. Istituto Superiore di Sanità. *Questionario Di Valutazione Degli Stili Di Vita*. Rome; 2015.
10. Kodraliu G, Mosconi P, Groth N, et al. Subjective health status assessment: evaluation of the Italian version of the SF-12 Health Survey. Results from the MiOS Project. *J Epidemiol Biostat.* 2001;6(3):305-316.
11. Utah Department of Health. *Health Status in Utah: The Medical Outcomes Study SF12*. Salt Lake City, UT; 1997.
12. Heinze G, Wallisch C, Dunkler D. Variable selection - A review and recommendations for the practicing statistician. *Biometrical J.* 2018;60(3):431-449. doi:10.1002/bimj.201700067.
13. Dormann CF, Elith J, Bacher S, et al. Collinearity: a review of methods to deal with it and a simulation study evaluating their performance. *Ecography (Cop).* 2013;36(1):27-46. doi:10.1111/j.1600-0587.2012.07348.x.
14. Deen JF, Krieger E V, Slee AE, et al. Metabolic Syndrome in Adults With Congenital Heart Disease. *J Am Heart Assoc.* 2016;5(2). doi:10.1161/JAHA.114.001132.
15. Krul AJ, Daanen HAM, Choi H. Self-reported and measured weight, height and body mass index (BMI) in Italy, the Netherlands and North America. *Eur J Public Health.* 2011;21(4):414-419. doi:10.1093/eurpub/ckp228.
16. ISTAT. *Rapporto Annuale 2018*. Rome; 2018.
17. Lugo A, Zuccaro P, Pacifici R, et al. Smoking in Italy in 2015-2016: Prevalence, Trends, Roll-your-own Cigarettes, and Attitudes towards Incoming Regulations. *Tumori J.* 2017;103(4):353-359. doi:10.5301/tj.5000644.
18. Caruana M, Grech V. Lifestyle Habits among Adult Congenital Heart Disease Patients in Malta. *Congenit Heart Dis.* 2016;11(4):332-340. doi:10.1111/chd.12366.
19. Zuccato E, Castiglioni S, Senta I, et al. Population surveys compared with wastewater analysis for monitoring illicit drug consumption in Italy in 2010–2014. *Drug Alcohol Depend.* 2016;161:178-188. doi:10.1016/J.DRUGALCDEP.2016.02.003.

- 1  
2  
3 20. Reid GJ, Webb GD, McCrindle BW, Irvine MJ, Siu SC. Health behaviors among adolescents  
4 and young adults with congenital heart disease. *Congenit Heart Dis*. 2008;3(1):16-25.  
5  
6 doi:10.1111/j.1747-0803.2007.00161.x.  
7  
8  
9  
10 21. Goyal H, Awad HH, Ghali JK. Role of cannabis in cardiovascular disorders. *J Thorac Dis*.  
11  
12 2017;9(7):2079-2092. doi:10.21037/jtd.2017.06.104.  
13  
14 22. Massidda M, Cugusi L, Mathieu A. Physical activity levels and health-related quality of life  
15 in young Italian population. *J Sports Med Phys Fitness*. 2015;55(5):506-512.  
16  
17 23. Tutarel O, Gabriel H, Diller G-P. Exercise: Friend or Foe in Adult Congenital Heart Disease?  
18  
19  
20  
21  
22 *Curr Cardiol Rep*. 2013;15(11):416. doi:10.1007/s11886-013-0416-9.  
23  
24 24. Hirth A, Reybrouck T, Bjarnason-Wehrens B, Lawrenz W, Hoffmann A. Recommendations  
25 for participation in competitive and leisure sports in patients with congenital heart disease: a  
26  
27 consensus document. *Eur J Cardiovasc Prev Rehabil*. 2006;13(3):293-299.  
28  
29  
30 25. Bassareo PP, Saba L, Solla P, Barbanti C, Marras AR, Mercurio G. Factors Influencing  
31  
32  
33  
34  
35  
36  
37  
38  
39  
40  
41  
42  
43  
44  
45  
46  
47  
48  
49  
50  
51  
52  
53  
54  
55  
56  
57  
58  
59  
60



**Table 1.** Study measurements

| <i>Tools</i>            | Socio-demographics | Lifestyles | Mental health | Physical health |
|-------------------------|--------------------|------------|---------------|-----------------|
| Developed questionnaire | <b>x</b>           | <b>x</b>   |               |                 |
| SF-12                   |                    |            | <b>x</b>      | <b>x</b>        |

For peer review only

**Table 2.** Descriptive characteristics of socio-demographics, lifestyles, ongoing treatment, and health perception (n=626)

|                                          |                                                     | n     | %     |
|------------------------------------------|-----------------------------------------------------|-------|-------|
| <b>Socio-demographic characteristics</b> | <i>Sex</i>                                          |       |       |
|                                          | Male                                                | 290   | 46.1  |
|                                          | Female                                              | 339   | 53.9  |
|                                          | <i>Provenience</i>                                  |       |       |
|                                          | Northern Italy                                      | 231   | 36.9% |
|                                          | Central Italy                                       | 223   | 35.6% |
|                                          | Southern Italy                                      | 172   | 27.5% |
|                                          | <i>Age</i>                                          |       |       |
|                                          | Years (mean; standard deviation)                    | 35.69 | 13.49 |
|                                          | Body Mass Index (BMI)                               |       |       |
|                                          | Kg/m <sup>2</sup> (mean; standard deviation)        | 23.18 | 4.07  |
|                                          | <i>Offspring</i>                                    |       |       |
|                                          | Yes                                                 | 208   | 33.2  |
|                                          | <i>Education</i>                                    |       |       |
|                                          | Lower or equal to high school                       | 490   | 78.3  |
|                                          | University education                                | 136   | 21.7  |
|                                          | <i>Occupation</i>                                   |       |       |
|                                          | Manager                                             | 32    | 5.1   |
|                                          | Office worker                                       | 263   | 42.0  |
| Student                                  | 113                                                 | 18.1  |       |
| Freelance                                | 84                                                  | 13.4  |       |
| Unemployed                               | 110                                                 | 17.6  |       |
| Retired                                  | 24                                                  | 3.8   |       |
| <b>Lifestyles</b>                        | <i>Smoking</i>                                      |       |       |
|                                          | Yes                                                 | 65    | 10.4  |
|                                          | <i>Illicit Drugs</i>                                |       |       |
|                                          | Occasionally                                        | 81    | 12.9  |
|                                          | Cannabis (occasionally consumer)                    | 77    | 12.3  |
|                                          | Cocaine (occasionally consumer)                     | 2     | 0.3   |
|                                          | <i>Regular physical activities</i>                  |       |       |
|                                          | Yes                                                 | 325   | 52.1  |
|                                          | On daily basis                                      | 53    | 8.5   |
|                                          | Two-three times per week                            | 247   | 39.4  |
|                                          | Once per week                                       | 40    | 6.4   |
|                                          | <i>Reasons to avoid regular physical activities</i> |       |       |
|                                          | Ill-judged                                          | 21    | 3.4   |
|                                          | Lack of willing                                     | 139   | 22.2  |
|                                          | Lack of energy                                      | 50    | 7.9   |
| Fear                                     | 93                                                  | 14.8  |       |
| <i>Daily time spent walking</i>          |                                                     |       |       |
| Less than 30 minutes                     | 285                                                 | 45.5  |       |
| Between 30 and 60 minutes                | 340                                                 | 54.3  |       |
| More than 60 minutes                     | 154                                                 | 24.6  |       |

|  |                                                         |       |       |
|--|---------------------------------------------------------|-------|-------|
|  | <i>Perception of adequate daily physical activities</i> |       |       |
|  | Yes                                                     | 285   | 45.5  |
|  | <i>Sexuality education</i>                              |       |       |
|  | Never received                                          | 6     | 0.9   |
|  | Poorly received                                         | 21    | 3.5   |
|  | Sufficiently received                                   | 122   | 19.5  |
|  | Adequately received                                     | 477   | 76.1  |
|  | <i>Contraceptive</i>                                    |       |       |
|  | Yes                                                     | 238   | 40.5  |
|  | <i>Low adherent to the ongoing medical treatment</i>    |       |       |
|  | Yes                                                     | 106   | 18.1  |
|  | <i>Medical therapy</i>                                  |       |       |
|  | Diuretics                                               | 104   | 16.6  |
|  | Antiarrhythmic therapy                                  | 121   | 19.3  |
|  | Anticoagulants                                          | 162   | 25.9  |
|  | Antiplatelet                                            | 87    | 13.9  |
|  | Antihypertensive therapy                                | 81    | 12.9  |
|  | Dietary supplements                                     | 160   | 25.6  |
|  | <i>Physical Health</i>                                  |       |       |
|  | Score (mean; standard deviation)                        | 48.69 | 8.96  |
|  | <i>Mental Health</i>                                    |       |       |
|  | Score (mean; standard deviation)                        | 45.56 | 10.99 |
|  | Adequate physical health (Yes)*                         | 337   | 53.6  |
|  | Adequate mental health (Yes)*                           | 401   | 63.8  |

*Note: (\*)Adequate physical and mental health were calculated considering the indication provided by Utah Health Status survey to establish the cut-off points for perception of adequate physical health (PCS12) and mental health (MCS12), adjusting scores by age.*

**Table 3.** Determinants of inadequate scores of PCS12 (outcome)

|                       | Wald's $\chi^2$ | d.f. | P     | e <sup>b</sup>                | 95%CI        |              |
|-----------------------|-----------------|------|-------|-------------------------------|--------------|--------------|
| <b>Predictors</b>     |                 |      |       |                               |              |              |
| Constant              | 15.21           | 1    | 0.000 |                               |              |              |
| Age                   | 1.382           | 1    | 0.240 | 0.991                         | 0.976        | 1.006        |
| BMI                   | 0.134           | 1    | 0.714 | 0.991                         | 0.946        | 1.039        |
| Diuretics             | 2.658           | 1    | 0.103 | 1.576                         | 0.912        | 2.725        |
| Antiarrhythmic        | 6.951           | 1    | 0.008 | <b>2.045</b>                  | <b>1.201</b> | <b>3.479</b> |
| Anticoagulants        | 4.499           | 1    | 0.034 | <b>1.638</b>                  | <b>1.038</b> | <b>2.585</b> |
| Antiplatelet          | 4.197           | 1    | 0.041 | <b>1.743</b>                  | <b>1.024</b> | <b>2.966</b> |
| Antihypertensive      | 2.198           | 1    | 0.138 | 1.546                         | 0.869        | 2.75         |
| <b>Model fit</b>      |                 |      |       |                               |              |              |
|                       | $\chi^2$        | d.f. | P     | Pseudo- $R^2$<br>(Nagelkerke) |              |              |
| Likelihood ratio test | 16.3            | 9    | 0.049 | 0.236                         |              |              |

**Table 4.** Determinants of inadequate scores of MCS12 (outcome)

|                       | Wald's $\chi^2$ | d.f. | P     | e <sup>b</sup>                                | 95%CI        |              |
|-----------------------|-----------------|------|-------|-----------------------------------------------|--------------|--------------|
| <b>Predictors</b>     |                 |      |       |                                               |              |              |
| Constant              | 1.437           | 1    | 0.231 |                                               |              |              |
| Age                   | 5.038           | 1    | 0.025 | <b>1.017</b>                                  | <b>1.002</b> | <b>1.032</b> |
| BMI                   | 1.784           | 1    | 0.182 | 0.968                                         | 0.924        | 1.015        |
| Diuretics             | 0.248           | 1    | 0.619 | 1.142                                         | 0.677        | 1.925        |
| Antiarrhythmic        | 0.683           | 1    | 0.409 | 1.241                                         | 0.744        | 2.070        |
| Anticoagulants        | 0.462           | 1    | 0.497 | 1.170                                         | 0.744        | 1.838        |
| Antiplatelet          | 0.019           | 1    | 0.891 | 0.965                                         | 0.581        | 1.603        |
| Antihypertensive      | 0.012           | 1    | 0.913 | 1.031                                         | 0.595        | 1.787        |
| <b>Model fit</b>      |                 |      |       |                                               |              |              |
|                       | $\chi^2$        | d.f. | P     | Pseudo- <i>R</i> <sup>2</sup><br>(Nagelkerke) |              |              |
| Likelihood ratio test | 16.3            | 9    | 0.049 | 0.135                                         |              |              |

STROBE Statement—Checklist of items that should be included in reports of *cross-sectional studies*

|                              | Item No                                                                            | Recommendation                                                                                                                                                                                               | Page No |
|------------------------------|------------------------------------------------------------------------------------|--------------------------------------------------------------------------------------------------------------------------------------------------------------------------------------------------------------|---------|
| <b>Title and abstract</b>    | 1                                                                                  | (a) Indicate the study's design with a commonly used term in the title or the abstract                                                                                                                       | 1-2     |
|                              |                                                                                    | (b) Provide in the abstract an informative and balanced summary of what was done and what was found                                                                                                          | 1-2     |
| <b>Introduction</b>          |                                                                                    |                                                                                                                                                                                                              |         |
| Background/rationale         | 2                                                                                  | Explain the scientific background and rationale for the investigation being reported                                                                                                                         | 4       |
| Objectives                   | 3                                                                                  | State specific objectives, including any prespecified hypotheses                                                                                                                                             | 4       |
| <b>Methods</b>               |                                                                                    |                                                                                                                                                                                                              |         |
| Study design                 | 4                                                                                  | Present key elements of study design early in the paper                                                                                                                                                      | 5       |
| Setting                      | 5                                                                                  | Describe the setting, locations, and relevant dates, including periods of recruitment, exposure, follow-up, and data collection                                                                              | 5-6     |
| Participants                 | 6                                                                                  | (a) Give the eligibility criteria, and the sources and methods of selection of participants                                                                                                                  | 5-6     |
| Variables                    | 7                                                                                  | Clearly define all outcomes, exposures, predictors, potential confounders, and effect modifiers. Give diagnostic criteria, if applicable                                                                     | 5-6     |
| Data sources/<br>measurement | 8*                                                                                 | For each variable of interest, give sources of data and details of methods of assessment (measurement). Describe comparability of assessment methods if there is more than one group                         | 5-6     |
| Bias                         | 9                                                                                  | Describe any efforts to address potential sources of bias                                                                                                                                                    | 6-7     |
| Study size                   | 10                                                                                 | Explain how the study size was arrived at                                                                                                                                                                    | 6       |
| Quantitative variables       | 11                                                                                 | Explain how quantitative variables were handled in the analyses. If applicable, describe which groupings were chosen and why                                                                                 | 5-6     |
| Statistical methods          | 12                                                                                 | (a) Describe all statistical methods, including those used to control for confounding                                                                                                                        | 6-7     |
|                              |                                                                                    | (b) Describe any methods used to examine subgroups and interactions                                                                                                                                          | 6-7     |
|                              | (c) Explain how missing data were addressed                                        | 6-7                                                                                                                                                                                                          |         |
|                              | (d) If applicable, describe analytical methods taking account of sampling strategy | na                                                                                                                                                                                                           |         |
|                              | (e) Describe any sensitivity analyses                                              | na                                                                                                                                                                                                           |         |
| <b>Results</b>               |                                                                                    |                                                                                                                                                                                                              |         |
| Participants                 | 13*                                                                                | (a) Report numbers of individuals at each stage of study—eg numbers potentially eligible, examined for eligibility, confirmed eligible, included in the study, completing follow-up, and analysed            | 8       |
|                              |                                                                                    | (b) Give reasons for non-participation at each stage                                                                                                                                                         | na      |
|                              |                                                                                    | (c) Consider use of a flow diagram                                                                                                                                                                           | na      |
| Descriptive data             | 14*                                                                                | (a) Give characteristics of study participants (eg demographic, clinical, social) and information on exposures and potential confounders                                                                     | 8       |
|                              |                                                                                    | (b) Indicate number of participants with missing data for each variable of interest                                                                                                                          | 8       |
| Outcome data                 | 15*                                                                                | Report numbers of outcome events or summary measures                                                                                                                                                         | 8       |
| Main results                 | 16                                                                                 | (a) Give unadjusted estimates and, if applicable, confounder-adjusted estimates and their precision (eg, 95% confidence interval). Make clear which confounders were adjusted for and why they were included | 8       |

|                          |    |                                                                                                                                                                            |     |
|--------------------------|----|----------------------------------------------------------------------------------------------------------------------------------------------------------------------------|-----|
|                          |    | (b) Report category boundaries when continuous variables were categorized                                                                                                  | na  |
|                          |    | (c) If relevant, consider translating estimates of relative risk into absolute risk for a meaningful time period                                                           | na  |
| Other analyses           | 17 | Report other analyses done—eg analyses of subgroups and interactions, and sensitivity analyses                                                                             | na  |
| <b>Discussion</b>        |    |                                                                                                                                                                            |     |
| Key results              | 18 | Summarise key results with reference to study objectives                                                                                                                   | 8-9 |
| Limitations              | 19 | Discuss limitations of the study, taking into account sources of potential bias or imprecision. Discuss both direction and magnitude of any potential bias                 | 9   |
| Interpretation           | 20 | Give a cautious overall interpretation of results considering objectives, limitations, multiplicity of analyses, results from similar studies, and other relevant evidence | 9   |
| Generalisability         | 21 | Discuss the generalisability (external validity) of the study results                                                                                                      | 9   |
| <b>Other information</b> |    |                                                                                                                                                                            |     |
| Funding                  | 22 | Give the source of funding and the role of the funders for the present study and, if applicable, for the original study on which the present article is based              | 11  |

\*Give information separately for exposed and unexposed groups.

**Note:** An Explanation and Elaboration article discusses each checklist item and gives methodological background and published examples of transparent reporting. The STROBE checklist is best used in conjunction with this article (freely available on the Web sites of PLoS Medicine at <http://www.plosmedicine.org/>, Annals of Internal Medicine at <http://www.annals.org/>, and Epidemiology at <http://www.epidem.com/>). Information on the STROBE Initiative is available at [www.strobe-statement.org](http://www.strobe-statement.org).

# BMJ Open

## Lifestyles and determinants of perceived health in Italian grown-up/adult congenital heart patients: A cross-sectional and pan-national survey

|                                 |                                                                                                                                                                                                                                                            |
|---------------------------------|------------------------------------------------------------------------------------------------------------------------------------------------------------------------------------------------------------------------------------------------------------|
| Journal:                        | <i>BMJ Open</i>                                                                                                                                                                                                                                            |
| Manuscript ID                   | bmjopen-2019-030917.R1                                                                                                                                                                                                                                     |
| Article Type:                   | Original research                                                                                                                                                                                                                                          |
| Date Submitted by the Author:   | 31-Jul-2019                                                                                                                                                                                                                                                |
| Complete List of Authors:       | Dellafiore, Federica; IRCCS Policlinico San Donato caruso, rosario; IRCCS Policlinico San Donato, Arrigoni, Cristina; University of Pavia Flocco, Serena; IRCCS Policlinico San Donato Giamberti, Alessandro Chessa, Massimo; IRCCS Policlinico San Donato |
| <b>Primary Subject Heading</b>: | Cardiovascular medicine                                                                                                                                                                                                                                    |
| Secondary Subject Heading:      | Nursing, Mental health, Public health                                                                                                                                                                                                                      |
| Keywords:                       | Congenital heart disease < CARDIOLOGY, Adult cardiology < CARDIOLOGY, MENTAL HEALTH                                                                                                                                                                        |
|                                 |                                                                                                                                                                                                                                                            |

SCHOLARONE™  
Manuscripts



*Title***Lifestyles and determinants of perceived health in Italian grown-up/adult congenital heart patients: A cross-sectional and pan-national survey***Authors*

Federica DELLAFIORÉ<sup>1</sup>, PhD, RN; Rosario CARUSO<sup>1</sup>, PhD, RN; Cristina ARRIGONI<sup>2</sup>, RN, MSc; Serena Francesca FLOCCO<sup>3</sup>, RN; Alessandro GIAMBERTI<sup>3</sup>, MD; Massimo CHESSA<sup>3</sup>, MD, PhD

*Affiliations*

1. Health Professions Research and Development Unit, IRCCS Policlinico San Donato, San Donato Milanese, Milan, Italy
2. Department of Public Health, Experimental and Forensic Medicine, Section of Hygiene, University of Pavia, Pavia, Italy
3. Pediatric and Adult Congenital Heart Disease Center, IRCCS Policlinico San Donato, San Donato Milanese, Milan, Italy

**Corresponding author**

Rosario Caruso, PhD, RN  
Head of Health Professions Research and Development Unit  
IRCCS Policlinico San Donato  
Via Agadir, 20-24  
20097 San Donato Milanese, Italy  
Phone: +39 0252774940  
Email: [rosario.caruso@unimi.it](mailto:rosario.caruso@unimi.it)

**Acknowledgements.** We wish to thank all the study participants, patient advisers and the ‘Associazione Italiana Cardiopatici Congeniti Adulti’ (AICCA).

## Abstract

**Objectives:** To provide the first epidemiological lifestyle descriptions of the Italian grown-up/adult congenital heart (GUCH/ACHD) population by identifying the determinants of poor perceived health status. **Design:** Cross-sectional pan-national survey. **Setting:** Italian GUCH/ACHD patients who were members of the Italian Association of GUCH/ACHD. **Primary and secondary outcome measures:** To discuss these lifestyle descriptions through an *ad hoc* developed questionnaire and health perceptions (i.e., mental and physical health perception) through an SF-12 questionnaire. **Results:** 629 patients included; many investigated GUCH/ACHD lifestyles were determined similar to those of the general population—with the exception of the smoking habits, which were lower. The odds of the occurrence of inadequate physical health perceptions increased by more than two times in patients undergoing antiarrhythmic therapies (OR adjusted = 2.045; 95% CI = 1.201-3.479; P = 0.008), more than 1.5 times in patients taking oral anticoagulants (OR adjusted = 1.638; 95% CI = 1.038-2.585; P = 0.034), and roughly 1.7 times in patients treated with antiplatelets (OR adjusted = 1.743; 95% CI = 1.024-2.966; P = 0.041). The odds of the occurrence of inadequate mental health perceptions increased by 1.7% for every year that the patients aged (OR adjusted = 1.017; 95% CI = 1.002-1.032; P = 0.025). **Conclusion:** Particular attention should be paid to these aging patients' increasing psychological needs, and additional research is needed to identify associations between their lifestyles and clinical outcomes.

**Keywords:** congenital heart disease; grown-up congenital heart; health perception; lifestyles; survey.

## Strengths and limitations of this study

- The study results require caution regarding their generalization, as lifestyle trajectories over time were not described due to the cross-sectional approach taken for the data collection process.
- The self-report approach taken during the clinical information collection requires caution, as a direct assessment of the respondents' actual clinical conditions was not performed to collect data.
- The sampling was performed using the contacts of the Italian Association of GUCH/ACHD (AICCA); therefore, a slight overestimation of the healthy lifestyle is possible, acknowledging that the AICCA patient-members may become more engaged in their treatment than may other patients.
- The questionnaire used in this survey to investigate lifestyles (*ad hoc* developed questionnaire) was validated for content and face validity, while the questionnaire that investigates health perceptions possesses well-known validity proprieties (SF-12).
- The surveyed patients equally represent Northern, Central, and Southern Italy.

## Introduction

Roughly 85% of children with congenital heart disease (CHD) live to adulthood and thus represent the population of grown-up/adult congenital heart disease (GUCH/ACHD) patients.<sup>1</sup> More precisely, the GUCH/ACHD rate has been growing steadily, even if accurate data on the size and characteristics of this population remain lacking.<sup>2</sup> Even if the large variety of CHD and its clinical problems require specific focus for improving the GUCH/ACHD clinical condition, this population also shares a number of important communalities mainly related to the modifiable risk factors of a decline in clinical status. Among these modifiable risk factors, lifestyle plays a pivotal role in improving the overall health conditions associated with GUCH/ACHD.<sup>3</sup> Further, the descriptions of these patients' socio-demographic and clinical determinants of their perceived health statuses play a paramount role in framing a comprehensive understanding of the actual weaknesses present in the educational plans and follow-ups. Specific interventions in the determinants of poor perceived health status may be useful for achieving the most favourable outcomes in the GUCH/ACHD population, as has been previously described for other chronic conditions, such as diabetes and acquired heart diseases.<sup>4-7</sup>

Thus far, the determinants of perceived health status among GUCH/ACHD patients remain poorly described on a global scale, despite their possible influence on the patients' overall adherence to follow-ups and, consequently, on patients' outcomes.<sup>8</sup> In Italy, neither lifestyles nor determinants of perceived health status among GUCH/ACHD patients have been previously for large samples, thus undermining the possibility of planning mid- and long-term strategies for patients who report poor perceived health or inadequate lifestyles. For these reasons, this study aimed to provide the first epidemiological lifestyle descriptions of the Italian GUCH/ACHD population by identifying the determinants of poor perceived health status.

## Material and methods

### *Design, study population and data collection*

This cross-sectional survey was promoted by an Italian GUCH/ACHD centre and supported by the Italian Association of GUCH/ACHD (AICCA). The study design and reporting method aligned with the ‘STrengthening the Reporting of OBservational studies in Epidemiology’ (STROBE) checklist (supplementary file 1). Data were collected through the list of contacts available in the AICCA’s repository between March and October 2017. More precisely, data were collected using a computer/mobile-assisted, web interviewing survey, and participants were sampled via the repertory of contacts of AICCA contacts and stratified to reflect the geo-graphical population by macro-area (i.e., Northern, Central and Southern Italy).

According to the study protocol (approved by the Ethical Committee of San Raffaele Hospital, Prot. N. 111/INT/2016), all patients were informed on the study’s aim and provided consent flagging an electronic form, whereas it was considered implicit due to their voluntarily and anonymously completion of the questionnaire.

### *Validation of the questionnaire on lifestyles*

The development of this study’s lifestyle questionnaire was based on a previous survey of the Italian National Institute of Public Health on the chronic disease population,<sup>9</sup> adapted using a process of face and content validity to detect the peculiarities of GUCH/ACHD. Accordingly, the questionnaire’s validation required the involvement of a multi-disciplinary panel of experts (n=14) to ascertain the new questionnaire’s face and content validity. The panellists (9 females; 35.7%) were aged a median of 44.6 years (interquartile range = 7.4 years), had a minimum of 4 years of experience in CHD field, and comprised the following professions: cardiac surgeons (n=2), clinical nutritionists (n=2), clinical psychologists (n=2), clinical cardiologists (n=2), clinical nurses (n=2), experts of public health (n=2), experts in instrument development with a background in nursing at the doctoral level (n=2). Precisely, face validity explored the panellists’ understanding of each item and their comments about the overall concept they purported to measure through an assessment

1  
2  
3 executed using open-ended questions. Conversely, content validity refers to the ‘quantitative’  
4  
5 agreement among panellists regarding how pertinent each item is in relation to the aim of its  
6  
7 measurement.  
8  
9

10 Content validity encompassed the panellists’ quantitative assessments using the content  
11  
12 validity ratio (CVR), and the content validity index for item and scale level (I-CVIs and S-CVI).  
13  
14 The CVR may potentially range between -1 (perfect disagreement among panelists) and +1 (perfect  
15  
16 agreement among panelists), while I-CVIs and S-CVI range between 0 (no content judged as  
17  
18 appropriate) and +1 (content totally judged as appropriate). As per the critical CVR cut-offs for  
19  
20 determining adequate/inadequate content indices (i.e., the lowest level of CVR such that the level of  
21  
22 agreement was greater than 50%), recent research was proposed to consider critical CVR values as  
23  
24 the statistics arising from binomial distribution that are applied to the panel sizes.<sup>10</sup> A critical CVR  
25  
26 value for 14 panelists is equal to 0.571;<sup>10</sup> as per I-CVIs, an adequate index must be equal or  
27  
28 superior to 0.75, while S-CVI must be equal or superior to 0.70.<sup>11</sup>  
29  
30  
31  
32

33 The first round of content validity was performed in June 2016 and was based on the  
34  
35 questionnaire proposed by the Italian National Institute of Public Health.<sup>9</sup> Thus, the panellists were  
36  
37 asked to propose modifications insofar as adequate for developing a questionnaire for the specific  
38  
39 GUCH/ACHD population. After four rounds of consulting the panellists and amending the  
40  
41 questionnaire, all CVR values were higher than 0.65, I-CVIs were equal or higher than 0.80, and S-  
42  
43 CVI was equal to 0.75. Further, the questionnaire was preliminarily tested on a small group of six  
44  
45 patients to evaluate the clarity of each item. Patients were asked to respond to a three-point Likert  
46  
47 scale (1=completely not understandable; == somewhat understandable; 3=completely  
48  
49 understandable) and an open-ended question to investigate the need for an eventual re-wording of  
50  
51 the terminology. We computed the Fleiss’ kappa to determine the level of quantitative agreement  
52  
53 between patients, which was 0.75 and indicated consensus in their defining of the questionnaire as  
54  
55 understandable, although some minor amendments to the items’ wording were requested as per the  
56  
57 answers to the open-ended question. Finally, the questionnaire validation process was concluded in  
58  
59  
60

1  
2  
3 January 2017 (supplementary file 2). The survey required roughly thirty minutes for its completion,  
4  
5 and no respondent received compensation for participating in this study.  
6

### 7 *Measurements*

8  
9  
10 The online survey collected the main socio-demographic and clinical characteristics of  
11  
12 GUCH/ACHD patients, including their lifestyles and perceived health statuses.  
13

14  
15 **Table 1** synthetizes the study's measurements; specifically, each participant's socio-  
16  
17 demographic and clinical characteristics include sex, age, family composition, working role,  
18  
19 educational background, provenience, body mass index (BMI), and therapeutic plan. The lifestyles  
20  
21 investigations revealed patients' dietary habits, substance use or abuse (e.g., smoking, drugs), and  
22  
23 physical and sexual activities. Conversely, their perceived health statuses were assessed using SF-  
24  
25 12,<sup>12</sup> which has notably been successfully developed as a shorter version of the SF-36 in nine  
26  
27 European countries and demonstrates adequate validity in measuring the physical and mental  
28  
29 components of health.<sup>12</sup> Thus, these components were respectively labelled physical component  
30  
31 summary (PCS) and mental component summary (MCS), both of which were scored from 0-100  
32  
33 using the procedure indicated by the authors of reference, wherein a higher value indicates a more  
34  
35 favourable health perception.<sup>12</sup> Further, it is possible to dichotomize the scores through an adequate  
36  
37 versus an inadequate health perception if we consider the median split strategy<sup>13</sup> and acknowledge  
38  
39 that the median scores of general Italian population, clustered by different age ranges, were  
40  
41 previously described.<sup>14</sup>  
42  
43  
44  
45

46  
47 ----Please, insert Table 1 ----  
48

### 49 *Statistical analysis*

50  
51 We calculated the response rate by considering the invitations sent to the contacts provided  
52  
53 by the AICCA. All the collected variables were preliminary checked for possible missing data,  
54  
55 outliers, or errors using an analysis of frequency distribution. Categorical variables were described  
56  
57 using frequency and percentage, while quantitative variables were assessed for normality via  
58  
59 skewness and kurtosis analysis, followed by Shapiro-Wilk test. According to the quantitative  
60

1  
2  
3 variable distributions, we employed mean  $\pm$  standard deviation (SD) or median and interquartile  
4 range (IQR) to describe these variables. The univariate analysis was based on multiple comparisons  
5 of the lifestyles, ongoing treatments, PCSs, and MCSs between the sub-groups defined by the socio-  
6 demographic characteristics. According to the nature of each variable, the comparisons were  
7 performed using the following possible tests:  $\chi^2$  test or Fisher exact test (when appropriate), Mann-  
8 Whitney U test or Kruskal-Wallis H test (for non-normally distributed variables), t-test or one-way  
9 ANOVA (for normally distributed variables). Variables exhibiting significant differences were  
10 evaluated to be used as predictors of inadequate PCS and MCS. A median split approach was used  
11 to dichotomize PCS and MCS,<sup>13</sup> by considering the median values previously described among  
12 Italians aged between 18 and 44 years.<sup>14</sup> Accordingly, PCS scores lower than 52.5 were considered  
13 as indicating inadequate physical health, while MCS scores lower than 51.2 were considered as  
14 indicating inadequate mental health. Subsequently, PCS and MCS were employed as dichotomous  
15 outcomes in two logistic regression (LR) models. The LR models were assessed for the possible  
16 collinearity between the independent variable by checking the strength of their bivariate  
17 associations, which should not exceed 0.45.<sup>15</sup> Maximum likelihood estimation was used to  
18 determine the unknown LR model parameters through the generalized linear model function of R,  
19 while the goodness of fit was determined with the Hosmer-Lemeshow test (non-significant P  
20 indicates a good fit), and Nagelkerke's pseudo- $R^2$ . The independent variables were simultaneously  
21 entered into the models to examine each variable's relatively unique contribution to health  
22 perception. Significance levels were set using  $\alpha = 5\%$ . Overall, missing data referred to the socio-  
23 demographic section were managed using pairwise deletions, while no missing data were expected  
24 in the answering of the questionnaire, as all the questions were mandatory to complete the survey.  
25 Statistical analysis was run through Statistical Package for the Social Sciences (SPSS) version 22  
26 (IBM Corporation) and R Statistical Package (R Foundation for Statistical Computing).

### *Patient and public involvement*



Neither patients nor the public were involved in the designing of this research, although both will be informed of the survey results via the AICCA network. Accordingly, the authors will employ the AICCA's support to disseminate the study results.

## Results

The response rate was 89.7% (626 responses out of 698 invitations), and **Table 2** illustrates the participants' socio-demographic characteristics, lifestyles, ongoing treatments and health perceptions. Roughly one of every five patients (n=106; 18.1%) declared to be lowly adherent to their ongoing medical treatment. Patients were primarily treated with oral anticoagulants (n=162; 25.9%), antiarrhythmic drugs (n=121; 19.3%), diuretics (n=104; 16.6%), antiplatelet therapy (n=87; 13.9%), antihypertensive drugs (n=81; 12.9%), and dietary supplements (n=160; 25.6%).

The physical health (PCS12) scores reached a mean (SD) equal to  $48.69 \pm 8.96$ , which was higher than that of mental health (MCS12;  $45.56 \pm 10.99$ ). Overall, the adequate physical and mental health scores were 53.6% (n=337) and 63.8% (n=401), respectively.

----Please, insert Table 2 ----

As **Table 3** indicates, the odds of inadequate physical health perception increased by more than two times in patients receiving antiarrhythmic therapy (OR adjusted = 2.045; 95% CI = 1.201-3.479; P = 0.008), more than 1.5 times in patients receiving oral anticoagulants (OR adjusted = 1.638; 95% CI = 1.038-2.585; P = 0.034), and roughly 1.7 times in patients treated with antiplatelets (OR adjusted = 1.743; 95% CI = 1.024-2.966; P = 0.041). Conversely, as per **Table 4**, the odds of inadequate mental health perception increased by roughly 2% for each year a participant aged (OR adjusted = 1.017; 95% CI = 1.002-1.032; P = 0.025).

----Please, insert Table 3 ----

----Please, insert Table 4 ----

## Discussion

This study represents the first overview in Italy of ACHD/GUCH patients' lifestyles by identifying determinants of poor perceived health status. Our results are strategic considering that they allow a comparison between the general population's lifestyles and those of ACHD/GUCH patients. These possible comparisons are particularly worthy considering that the majority of patients born with CHD are expected to survive into adulthood, being exposed to the general risks of inadequate lifestyles (i.e. modifiable cardiovascular risks).<sup>16</sup> Further, this study contributes to identify potentially important determinants of poor physical and mental health and focuses attention onto patients who present those determinants.

This study highlights that associations exist between antiarrhythmic drugs, oral anticoagulants, antiplatelet drugs, and lower physical health status. To the best of our knowledge, this study provides the first empirical evidence of these associations in the GUCH/ACHD population. Previous research has demonstrated similar results in patients with paroxysmal atrial fibrillation, wherein patients treated with antiarrhythmic drugs reported lower physical health than did patients treated with radiofrequency ablation.<sup>17</sup> Even if the literature does not fully address the question of whether or not physical health is directly associated with antiarrhythmic drugs in patients with atrial fibrillation,<sup>17</sup> there is room in the clinical practice for monitoring the physical health trajectories of patients treated with antiarrhythmic drug over time. Similar associations with a decreased quality of life and physical health were described in patients treated with anticoagulants and/or antiplatelet drugs,<sup>18</sup> even if little is currently known in GUCH/ACHD population about the effects of these drugs on physical and mental health statuses.<sup>19</sup> These associations should be studied in future research, and possible manifestations of side effects should be monitored to understand whether the worsening of one's physical health is related to the drug-related side effects or other factors, such as the psychological burden related to one's need for medical therapy in terms of posology and adherence.

As described above, our results profile patients who are at greater risk for achieving inadequate physical health in consideration of their ongoing treatments. Conversely, mental health

1  
2  
3 status seems to worsen as individuals age, which may be related to many GUCH/ACHD patients'  
4 previously described fear of ageing, that is enhanced by a sense of uncertainty;<sup>20</sup> in other words, the  
5 GUCH/ACHD population's psychological needs increase with age.  
6  
7  
8  
9

10 An unexpected result was related to the rates of reported physical activities, which were  
11 consistent with those described for the general population.<sup>21</sup> Our initial expectation was to identify a  
12 lower rate of physical activity in GUCH/ACHD patients, because past clinicians restricted patients'  
13 activity due to concerns that increased activity might be risky for patients' health.<sup>22</sup> Over the last ten  
14 years, the recommendations from a consensus of an international expert panel endorsed by the  
15 European Society of Cardiology (ESC) encourage that all CHD patients regularly exercise; while  
16 these recommendations are mainly based on expert opinion, there nevertheless exists scarce evidence  
17 for the effects of exercise training.<sup>23</sup> Our results confirm the shifting of paradigm from the restriction  
18 of physical activities to its support of educational advices. Accordingly, the steady progress in  
19 GUCH/ACHD diagnostics emphasize the life-long benefits of regular physical activity for general  
20 health as well as in complex CHD (adequately adherent to the follow-ups).<sup>24</sup>  
21  
22  
23  
24  
25  
26  
27  
28  
29  
30  
31  
32  
33  
34

35 Overall, our sample reported an adequate BMI that was slightly lower than previous  
36 epidemiological, self-report BMI assessments of the Italian general population aged between 30 and  
37 45 years.<sup>25</sup> The other socio-demographic characteristics are consistent with the current data regarding  
38 general population.<sup>25,26</sup> Concerning lifestyles, the rate of smokers among the GUCH/ACHD sample  
39 (10.4%) appears to be encouragingly lower than that reported in general population (21.4%)<sup>27</sup> as well  
40 as that determined by a recent description in Malta.<sup>28</sup> This result may be related to the clinicians' high  
41 sensibility when providing regular anti-smoking advice and education. Cannabis consumption, on the  
42 other hand, appears to be consistent with and slightly higher than the general population's rate of self-  
43 reported consumption.<sup>29</sup> This result is also in line with previous evidence of younger adults with  
44 CHD, whose behaviours were described as being more strongly influenced by peer relationships than  
45 the awareness of one's clinical condition.<sup>30</sup> Clinicians should address this aspect with increasing  
46 attention to reduce illicit drug consumption by administering to the GUCH/ACHD population  
47  
48  
49  
50  
51  
52  
53  
54  
55  
56  
57  
58  
59  
60

1  
2  
3 detailed information that highlights the risk of increased systolic blood pressure, orthostatic  
4  
5 hypotension, and ischemic stroke.<sup>31</sup>  
6

### 7 8 *Limitations*

9  
10 This study's findings are subject to some important limitations. Firstly, the impossibility of  
11  
12 collecting reliable clinical data (e.g., CHD classification, diagnostics) undermined the possibility of  
13  
14 drawing solid, inferential associations between lifestyles (behaviours) and clinical outcomes. For  
15  
16 this reason, this study has mainly provided descriptive information to frame new knowledge of the  
17  
18 Italian GUCH/ACHD population's lifestyles. Secondly, we suspect the possibility that the levels of  
19  
20 risky behaviours were underestimated and the levels of healthy behaviours were overestimated  
21  
22 according to the potential social desirability effect's occurrence in the participants' responses.  
23  
24 However, the choice to anonymously collect data should have limited the probability that the social  
25  
26 desirability effect would occur. Thirdly, data collection was performed using the AICCA network,  
27  
28 which may have introduced a bias in the sampling procedure because patients from the AICCA—  
29  
30 that is, patients who have learned skills of observation, description, and symptom handling, thus  
31  
32 increasing their basic knowledge of health problems—may have more likely been 'activated' than  
33  
34 general patients and because they were not representative of the general population. We believe this  
35  
36 sampling bias is generally marginal in this study, as the AICCA holds the contacts of real-world  
37  
38 patients from the majority of CHD centres in Italy, and not all patients in the AICCA network  
39  
40 actively participate in the association's initiative. Fourthly, this study has included no information  
41  
42 on the possible manifestations of drug-related side effects or other factors that may interact through  
43  
44 the relationship between drugs and physical health, which such information might help effectively  
45  
46 interpret. Overall, considering this study's limitations, we suggest that caution be taken when  
47  
48 generalizing the results. This study's strengths are related firstly to the fact that patients roughly  
49  
50 equally represent Northern, Central, and Southern Italy and secondly to the prudent approach used  
51  
52 to analyse the data.  
53  
54  
55  
56  
57  
58  
59  
60

## Conclusions

Thus far, this study represents the first lifestyle descriptions of the Italian GUCH/ACHD population, and we have identified a number of similarities and differences among the general Italian population. Clinicians should address the issue of illicit drug consumption (especially cannabis) more deeply, and particular attention should be paid to accommodating the increasing psychological needs resulting from these patients' age progression. More research is needed to identify the associations between lifestyles and clinical outcomes to determine additional details for homogenous sub-group stratifications in consideration of patients' clinical information, such as CHD classification.

### Author's contributions statement

RC, FD, CA, SFF, AG, and MC: conception and design, FD, SFF, AG and MC was particularly involved in the acquisition of data, RC and CA in analysis and interpretation of data; RC, FD, CA, SFF, AG, and MC have substantially contributed in drafting the manuscript and in providing critical revision of important intellectual content. Each author gave their final approval of the version to be published. Each author should have participated sufficiently in the work to take public responsibility for appropriate portions of the content.

### Competing interests

The authors declare no conflict of interest.

### Funding

This research was partially supported by 'Ricerca Corrente' funding from Italian Ministry of Health to IRCCS Policlinico San Donato.

### Data sharing statement

We intend to make data freely available the data upon request to the corresponding author (rosario.caruso@unimi.it).

## References

1. Baumgartner H, Bonhoeffer P, De Groot NMS, et al. ESC Guidelines for the management of grown-up congenital heart disease (new version 2010): The Task Force on the Management of Grown-up Congenital Heart Disease of the European Society of Cardiology (ESC). *Eur Heart J*. 2010;31(23):2915-2957. doi:10.1093/eurheartj/ehq249
2. van der Linde D, Konings EEM, Slager MA, et al. Birth Prevalence of Congenital Heart Disease Worldwide: A Systematic Review and Meta-Analysis. *J Am Coll Cardiol*. 2011;58(21):2241-2247. doi:10.1016/J.JACC.2011.08.025
3. Flocco SF, Caruso R, Dellafiore F, et al. [The effect of the transition care model on health perception among adolescents with congenital heart disease: a quasi-experimental study]. *G Ital Cardiol*. 2018;19(6):386-393. doi:10.1714/2922.29372
4. Dellafiore F, Conte G, Baroni I, et al. Gender differences in heart failure self-care behaviors: do we know enough? *Minerva Med*. 2018;109(5):401-403. doi:10.23736/S0026-4806.18.05579-9
5. Caruso R, Arrigoni C, Magon A, et al. Health determinants in italian type 2 diabetes Mellitus (T2DM) patients: A critical gender differences analysis. *J Res Genet Stud*. 2017;7(2):93-108. doi:10.22381/JRGS7220176
6. Dellafiore F, Arrigoni C, Pittella F, Conte G, Magon A, Caruso R. Paradox of self-care gender differences among Italian patients with chronic heart failure: findings from a real-world cross-sectional study. *BMJ Open*. 2018;8(9):e021966. doi:10.1136/bmjopen-2018-021966

1  
2  
3  
4  
5  
6  
7  
8  
9  
10  
11  
12  
13  
14  
15  
16  
17  
18  
19  
20  
21  
22  
23  
24  
25  
26  
27  
28  
29  
30  
31  
32  
33  
34  
35  
36  
37  
38  
39  
40  
41  
42  
43  
44  
45  
46  
47  
48  
49  
50  
51  
52  
53  
54  
55  
56  
57  
58  
59  
60

7. Caruso R, Magon A, Baroni I, et al. Health literacy in type 2 diabetes patients: a systematic review of systematic reviews. *Acta Diabetol.* 2017. doi:10.1007/s00592-017-1071-1
8. Dontje ML, Feenstra M, de Greef MHG, Nieuwland W, Hoendermis ES. Are Grown-ups with Congenital Heart Disease Willing to Participate in an Exercise Program? *Congenit Heart Dis.* 2014;9(1):38-44. doi:10.1111/chd.12069
9. Istituto Superiore di Sanità. *Questionario Di Valutazione Degli Stili Di Vita.* Rome; 2015. [http://old.iss.it/binary/ofad/cont/questionario\\_giovani\\_in\\_forma.1225957648.pdf](http://old.iss.it/binary/ofad/cont/questionario_giovani_in_forma.1225957648.pdf). Accessed October 5, 2018.
10. Wilson FR, Pan W, Schumsky DA. Recalculation of the Critical Values for Lawshe's Content Validity Ratio. *Meas Eval Couns Dev.* 2012;45(3):197-210. doi:10.1177/0748175612440286
11. Polit DF, Beck CT, Owen S V. Is the CVI an acceptable indicator of content validity? Appraisal and recommendations. *Res Nurs Health.* 2007;30(4):459-467. doi:10.1002/nur.20199
12. Kodraliu G, Mosconi P, Groth N, et al. Subjective health status assessment: evaluation of the Italian version of the SF-12 Health Survey. Results from the MiOS Project. *J Epidemiol Biostat.* 2001;6(3):305-316.
13. DeCoster J, Gallucci M, Iselin A-MR. Best Practices for Using Median Splits, Artificial Categorization, and their Continuous Alternatives. *J Exp Psychopathol.* 2011;2(2):197-209. doi:10.5127/jep.008310
14. Gandek B, Ware JE, Aaronson NK, et al. Cross-validation of item selection and scoring for the SF-12 Health Survey in nine countries: results from the IQOLA Project. International Quality of Life Assessment. *J Clin Epidemiol.* 1998;51(11):1171-1178.
15. Dormann CF, Elith J, Bacher S, et al. Collinearity: a review of methods to deal with it and a simulation study evaluating their performance. *Ecography (Cop).* 2013;36(1):27-46. doi:10.1111/j.1600-0587.2012.07348.x

16. Deen JF, Krieger E V, Slee AE, et al. Metabolic Syndrome in Adults With Congenital Heart Disease. *J Am Heart Assoc.* 2016;5(2). doi:10.1161/JAHA.114.001132
17. Reynolds MR, Walczak J, White SA, Cohen DJ, Wilber DJ. Improvements in symptoms and quality of life in patients with paroxysmal atrial fibrillation treated with radiofrequency catheter ablation versus antiarrhythmic drugs. *Circ Cardiovasc Qual Outcomes.* 2010;3(6):615-623. doi:10.1161/CIRCOUTCOMES.110.957563
18. Hasan SS, Teh KM, Ahmed SI, Chong DWK, Ong HC, Naina B. Quality of life (QoL) and International Normalized Ratio (INR) control of patients attending anticoagulation clinics. *Public Health.* 2015;129(7):954-962. doi:10.1016/J.PUHE.2015.05.014
19. Fteropoulli T, Stygall J, Cullen S, Deanfield J, Newman SP. Quality of life of adult congenital heart disease patients: a systematic review of the literature. *Cardiol Young.* 2013;23(4):473-485. doi:10.1017/S1047951112002351
20. Oliver JM, Gallego P, Gonzalez AE, et al. Impact of age and sex on survival and causes of death in adults with congenital heart disease. *Int J Cardiol.* 2017;245:119-124. doi:10.1016/J.IJCARD.2017.06.060
21. Massidda M, Cugusi L, Mathieu A. Physical activity levels and health-related quality of life in young Italian population. *J Sports Med Phys Fitness.* 2015;55(5):506-512.
22. Tutarel O, Gabriel H, Diller G-P. Exercise: Friend or Foe in Adult Congenital Heart Disease? *Curr Cardiol Rep.* 2013;15(11):416. doi:10.1007/s11886-013-0416-9
23. Hirth A, Reybrouck T, Bjarnason-Wehrens B, Lawrenz W, Hoffmann A. Recommendations for participation in competitive and leisure sports in patients with congenital heart disease: a consensus document. *Eur J Cardiovasc Prev Rehabil.* 2006;13(3):293-299.
24. Bassareo PP, Saba L, Solla P, Barbanti C, Marras AR, Mercurio G. Factors Influencing Adaptation and Performance at Physical Exercise in Complex Congenital Heart Diseases after Surgical Repair. *Biomed Res Int.* 2014;2014:862372. doi:10.1155/2014/862372
25. Krul AJ, Daanen HAM, Choi H. Self-reported and measured weight, height and body mass



1  
2  
3  
4  
5  
6  
7  
8  
9  
10  
11  
12  
13  
14  
15  
16  
17  
18  
19  
20  
21  
22  
23  
24  
25  
26  
27  
28  
29  
30  
31  
32  
33  
34  
35  
36  
37  
38  
39  
40  
41  
42  
43  
44  
45  
46  
47  
48  
49  
50  
51  
52  
53  
54  
55  
56  
57  
58  
59  
60

index (BMI) in Italy, the Netherlands and North America. *Eur J Public Health*.

2011;21(4):414-419. doi:10.1093/eurpub/ckp228

26. ISTAT. *Rapporto Annuale 2018*. Rome; 2018. <https://www.istat.it/storage/rapporto-annuale/2018/Rapportoannuale2018.pdf>. Accessed October 23, 2018.
27. Lugo A, Zuccaro P, Pacifici R, et al. Smoking in Italy in 2015-2016: Prevalence, Trends, Roll-your-own Cigarettes, and Attitudes towards Incoming Regulations. *Tumori J*. 2017;103(4):353-359. doi:10.5301/tj.5000644
28. Caruana M, Grech V. Lifestyle Habits among Adult Congenital Heart Disease Patients in Malta. *Congenit Heart Dis*. 2016;11(4):332-340. doi:10.1111/chd.12366
29. Zuccato E, Castiglioni S, Senta I, et al. Population surveys compared with wastewater analysis for monitoring illicit drug consumption in Italy in 2010–2014. *Drug Alcohol Depend*. 2016;161:178-188. doi:10.1016/J.DRUGALCDEP.2016.02.003
30. Reid GJ, Webb GD, McCrindle BW, Irvine MJ, Siu SC. Health Behaviors among Adolescents and Young Adults with Congenital Heart Disease. *Congenit Heart Dis*. 2008;3(1):16-25. doi:10.1111/j.1747-0803.2007.00161.x
31. Goyal H, Awad HH, Ghali JK. Role of cannabis in cardiovascular disorders. *J Thorac Dis*. 2017;9(7):2079-2092. doi:10.21037/jtd.2017.06.104

**Table 1.** Study measurements

| <i>Tools</i>            | Socio-demographics | Lifestyles | Mental health | Physical health |
|-------------------------|--------------------|------------|---------------|-----------------|
| Developed questionnaire | <b>x</b>           | <b>x</b>   |               |                 |
| SF-12                   |                    |            | <b>x</b>      | <b>x</b>        |

For peer review only

**Table 2.** Descriptive characteristics of socio-demographics, lifestyles, ongoing treatment, and health perception (n=629)

|                                                     |                                    | n                                                 | %           |
|-----------------------------------------------------|------------------------------------|---------------------------------------------------|-------------|
| <b>Socio-demographic characteristics</b>            | <i>Sex</i>                         |                                                   |             |
|                                                     |                                    | Male                                              | 290 46.1    |
|                                                     |                                    | Female                                            | 339 53.9    |
|                                                     | <i>Provenience</i>                 |                                                   |             |
|                                                     |                                    | Northern Italy                                    | 231 36.9%   |
|                                                     |                                    | Central Italy                                     | 223 35.6%   |
|                                                     |                                    | Southern Italy                                    | 172 27.5%   |
|                                                     |                                    | Missing data                                      | 3 -         |
|                                                     | <i>Age</i>                         |                                                   |             |
|                                                     |                                    | Years (mean; standard deviation; range: 18-57)    | 35.69 13.49 |
|                                                     | <i>Body Mass Index (BMI)</i>       |                                                   |             |
|                                                     |                                    | Kg/m <sup>2</sup> (mean; standard deviation)      | 23.18 4.07  |
|                                                     |                                    | Underweight (BMI < 18.5 Kg/m <sup>2</sup> )       | 68 10.9     |
|                                                     |                                    | Normal weight (BMI: 18.5-24.9 Kg/m <sup>2</sup> ) | 373 59.4    |
|                                                     |                                    | Overweight (BMI: 25-29.9 Kg/m <sup>2</sup> )      | 145 23      |
|                                                     |                                    | Obese (BMI > 30 Kg/m <sup>2</sup> )               | 42 6.7      |
|                                                     |                                    | Missing data                                      | 1 -         |
|                                                     | <i>Offspring</i>                   |                                                   |             |
|                                                     |                                    | Yes                                               | 208 33.2    |
|                                                     | <i>Education</i>                   |                                                   |             |
|                                                     |                                    | Lower or equal to high school                     | 490 78.3    |
|                                                     |                                    | University education                              | 136 21.7    |
|                                                     |                                    | Missing data                                      | 3 -         |
|                                                     | <i>Occupation</i>                  |                                                   |             |
|                                                     |                                    | Manager                                           | 32 5.1      |
|                                                     |                                    | Office worker                                     | 263 42.0    |
|                                                     |                                    | Student                                           | 113 18.1    |
|                                                     |                                    | Freelance                                         | 84 13.4     |
|                                                     |                                    | Unemployed                                        | 110 17.6    |
|                                                     | Retired                            | 25 3.8                                            |             |
|                                                     | Missing data                       | 2 -                                               |             |
| <b>Lifestyles</b>                                   | <i>Smoking</i>                     |                                                   |             |
|                                                     |                                    | Yes                                               | 65 10.4     |
|                                                     | <i>Illicit Drugs</i>               |                                                   |             |
|                                                     |                                    | Occasionally                                      | 81 12.9     |
|                                                     |                                    | Cannabis (occasionally consumer)                  | 77 12.3     |
|                                                     |                                    | Cocaine (occasionally consumer)                   | 2 0.3       |
|                                                     | <i>Regular physical activities</i> |                                                   |             |
|                                                     |                                    | Yes                                               | 325 52.1    |
|                                                     |                                    | On daily basis                                    | 53 8.5      |
|                                                     |                                    | Two-three times per week                          | 247 39.4    |
|                                                     | Once per week                      | 40 6.4                                            |             |
| <i>Reasons to avoid regular physical activities</i> |                                    |                                                   |             |

|  |                                                         |       |       |
|--|---------------------------------------------------------|-------|-------|
|  | Ill-judged                                              | 21    | 3.4   |
|  | Lack of willing                                         | 139   | 22.2  |
|  | Lack of energy                                          | 50    | 7.9   |
|  | Fear                                                    | 93    | 14.8  |
|  | <i>Daily time spent walking</i>                         |       |       |
|  | Less than 30 minutes                                    | 285   | 45.5  |
|  | Between 30 and 60 minutes                               | 340   | 54.3  |
|  | More than 60 minutes                                    | 154   | 24.6  |
|  | <i>Perception of adequate daily physical activities</i> |       |       |
|  | Yes                                                     | 285   | 45.5  |
|  | <i>Sexuality education</i>                              |       |       |
|  | Never received                                          | 6     | 0.9   |
|  | Poorly received                                         | 21    | 3.5   |
|  | Sufficiently received                                   | 122   | 19.5  |
|  | Adequately received                                     | 477   | 76.1  |
|  | <i>Contraceptive</i>                                    |       |       |
|  | Yes                                                     | 238   | 40.5  |
|  | <i>Low adherent to the ongoing medical treatment</i>    |       |       |
|  | Yes                                                     | 106   | 18.1  |
|  | <i>Medical therapy</i>                                  |       |       |
|  | Diuretics                                               | 104   | 16.6  |
|  | Antiarrhythmic therapy                                  | 121   | 19.3  |
|  | Anticoagulants                                          | 162   | 25.9  |
|  | Antiplatelet                                            | 87    | 13.9  |
|  | Antihypertensive therapy                                | 81    | 12.9  |
|  | Dietary supplements                                     | 160   | 25.6  |
|  | <i>Physical Health</i>                                  |       |       |
|  | Score (mean; standard deviation)                        | 48.69 | 8.96  |
|  | <i>Mental Health</i>                                    |       |       |
|  | Score (mean; standard deviation)                        | 45.56 | 10.99 |
|  | Adequate physical health (Yes)*                         | 337   | 53.6  |
|  | Adequate mental health (Yes)*                           | 401   | 63.8  |

Note: (\*) Adequate physical and mental health were calculated using the median split, based on the Italian median scores of the study of the IQOLA Project (median score of physical health in general population was equal to 52.5; median score of mental health was equal to 51.2).

As per the univariate analysis to highlight differences between physical/mental health (inadequate versus adequate) and the investigated variables listed in the table 1, results are as follow: the frequencies of each used drug differs between groups (each  $\chi^2$  had  $P < 0.001$ ), while higher BMI category frequencies were higher in inadequate physical health ( $P = 0.033$ ). The comparison of the age through t-test reported statistical significant differences between physical/mental health (inadequate versus adequate).

**Table 3.** Determinants of inadequate scores of PCS12 (outcome)

| Predictor             | Wald's $\chi^2$ | d.f. | P     | e <sup>b</sup>                        | 95%CI        |              |
|-----------------------|-----------------|------|-------|---------------------------------------|--------------|--------------|
| Constant              | 15.21           | 1    | 0.000 |                                       |              |              |
| Age                   | 1.382           | 1    | 0.24  | 0.991                                 | 0.976        | 1.006        |
| BMI                   | 0.134           | 1    | 0.714 | 0.991                                 | 0.946        | 1.039        |
| Diuretics             | 2.658           | 1    | 0.103 | 1.576                                 | 0.912        | 2.725        |
| Antiarrhythmic        | 6.951           | 1    | 0.008 | <b>2.045</b>                          | <b>1.201</b> | <b>3.479</b> |
| Anticoagulants        | 4.499           | 1    | 0.034 | <b>1.638</b>                          | <b>1.038</b> | <b>2.585</b> |
| Antiplatelet          | 4.197           | 1    | 0.041 | <b>1.743</b>                          | <b>1.024</b> | <b>2.966</b> |
| Antihypertensive      | 2.198           | 1    | 0.138 | 1.546                                 | 0.869        | 2.75         |
| Model fit             | $\chi^2$        | d.f. | P     | Pseudo-R <sup>2</sup><br>(Nagelkerke) |              |              |
| Likelihood ratio test | 16.3            | 9    | 0.049 | 0.236                                 |              |              |

**Table 4.** Determinants of inadequate scores of MCS12 (outcome)

| Predictor             | Wald's $\chi^2$ | d.f. | P     | e <sup>b</sup>                        | 95%CI        |              |
|-----------------------|-----------------|------|-------|---------------------------------------|--------------|--------------|
| Constant              | 1.437           | 1    | 0.231 |                                       |              |              |
| Age                   | 5.038           | 1    | 0.025 | <b>1.017</b>                          | <b>1.002</b> | <b>1.032</b> |
| BMI                   | 1.784           | 1    | 0.182 | 0.968                                 | 0.924        | 1.015        |
| Diuretics             | 0.248           | 1    | 0.619 | 1.142                                 | 0.677        | 1.925        |
| Antiarrhythmic        | 0.683           | 1    | 0.409 | 1.241                                 | 0.744        | 2.070        |
| Anticoagulants        | 0.462           | 1    | 0.497 | 1.170                                 | 0.744        | 1.838        |
| Antiplatelet          | 0.019           | 1    | 0.891 | 0.965                                 | 0.581        | 1.603        |
| Antihypertensive      | 0.012           | 1    | 0.913 | 1.031                                 | 0.595        | 1.787        |
| Model fit             | $\chi^2$        | d.f. | P     | Pseudo-R <sup>2</sup><br>(Nagelkerke) |              |              |
| Likelihood ratio test | 16.3            | 9    | 0.049 | 0.135                                 |              |              |

STROBE Statement—Checklist of items that should be included in reports of *cross-sectional studies*

|                              | Item No                                                                            | Recommendation                                                                                                                                                                                               | Page No |
|------------------------------|------------------------------------------------------------------------------------|--------------------------------------------------------------------------------------------------------------------------------------------------------------------------------------------------------------|---------|
| <b>Title and abstract</b>    | 1                                                                                  | (a) Indicate the study's design with a commonly used term in the title or the abstract                                                                                                                       | 1-2     |
|                              |                                                                                    | (b) Provide in the abstract an informative and balanced summary of what was done and what was found                                                                                                          | 1-2     |
| <b>Introduction</b>          |                                                                                    |                                                                                                                                                                                                              |         |
| Background/rationale         | 2                                                                                  | Explain the scientific background and rationale for the investigation being reported                                                                                                                         | 4       |
| Objectives                   | 3                                                                                  | State specific objectives, including any prespecified hypotheses                                                                                                                                             | 4       |
| <b>Methods</b>               |                                                                                    |                                                                                                                                                                                                              |         |
| Study design                 | 4                                                                                  | Present key elements of study design early in the paper                                                                                                                                                      | 5       |
| Setting                      | 5                                                                                  | Describe the setting, locations, and relevant dates, including periods of recruitment, exposure, follow-up, and data collection                                                                              | 5-6     |
| Participants                 | 6                                                                                  | (a) Give the eligibility criteria, and the sources and methods of selection of participants                                                                                                                  | 5-6     |
| Variables                    | 7                                                                                  | Clearly define all outcomes, exposures, predictors, potential confounders, and effect modifiers. Give diagnostic criteria, if applicable                                                                     | 5-6     |
| Data sources/<br>measurement | 8*                                                                                 | For each variable of interest, give sources of data and details of methods of assessment (measurement). Describe comparability of assessment methods if there is more than one group                         | 5-6     |
| Bias                         | 9                                                                                  | Describe any efforts to address potential sources of bias                                                                                                                                                    | 6-7     |
| Study size                   | 10                                                                                 | Explain how the study size was arrived at                                                                                                                                                                    | 6       |
| Quantitative variables       | 11                                                                                 | Explain how quantitative variables were handled in the analyses. If applicable, describe which groupings were chosen and why                                                                                 | 5-6     |
| Statistical methods          | 12                                                                                 | (a) Describe all statistical methods, including those used to control for confounding                                                                                                                        | 6-7     |
|                              |                                                                                    | (b) Describe any methods used to examine subgroups and interactions                                                                                                                                          | 6-7     |
|                              | (c) Explain how missing data were addressed                                        | 6-7                                                                                                                                                                                                          |         |
|                              | (d) If applicable, describe analytical methods taking account of sampling strategy | na                                                                                                                                                                                                           |         |
|                              | (e) Describe any sensitivity analyses                                              | na                                                                                                                                                                                                           |         |
| <b>Results</b>               |                                                                                    |                                                                                                                                                                                                              |         |
| Participants                 | 13*                                                                                | (a) Report numbers of individuals at each stage of study—eg numbers potentially eligible, examined for eligibility, confirmed eligible, included in the study, completing follow-up, and analysed            | 8       |
|                              |                                                                                    | (b) Give reasons for non-participation at each stage                                                                                                                                                         | na      |
|                              |                                                                                    | (c) Consider use of a flow diagram                                                                                                                                                                           | na      |
| Descriptive data             | 14*                                                                                | (a) Give characteristics of study participants (eg demographic, clinical, social) and information on exposures and potential confounders                                                                     | 8       |
|                              |                                                                                    | (b) Indicate number of participants with missing data for each variable of interest                                                                                                                          | 8       |
| Outcome data                 | 15*                                                                                | Report numbers of outcome events or summary measures                                                                                                                                                         | 8       |
| Main results                 | 16                                                                                 | (a) Give unadjusted estimates and, if applicable, confounder-adjusted estimates and their precision (eg, 95% confidence interval). Make clear which confounders were adjusted for and why they were included | 8       |

|                          |    |                                                                                                                                                                            |     |
|--------------------------|----|----------------------------------------------------------------------------------------------------------------------------------------------------------------------------|-----|
|                          |    | (b) Report category boundaries when continuous variables were categorized                                                                                                  | na  |
|                          |    | (c) If relevant, consider translating estimates of relative risk into absolute risk for a meaningful time period                                                           | na  |
| Other analyses           | 17 | Report other analyses done—eg analyses of subgroups and interactions, and sensitivity analyses                                                                             | na  |
| <b>Discussion</b>        |    |                                                                                                                                                                            |     |
| Key results              | 18 | Summarise key results with reference to study objectives                                                                                                                   | 8-9 |
| Limitations              | 19 | Discuss limitations of the study, taking into account sources of potential bias or imprecision. Discuss both direction and magnitude of any potential bias                 | 9   |
| Interpretation           | 20 | Give a cautious overall interpretation of results considering objectives, limitations, multiplicity of analyses, results from similar studies, and other relevant evidence | 9   |
| Generalisability         | 21 | Discuss the generalisability (external validity) of the study results                                                                                                      | 9   |
| <b>Other information</b> |    |                                                                                                                                                                            |     |
| Funding                  | 22 | Give the source of funding and the role of the funders for the present study and, if applicable, for the original study on which the present article is based              | 11  |

\*Give information separately for exposed and unexposed groups.

**Note:** An Explanation and Elaboration article discusses each checklist item and gives methodological background and published examples of transparent reporting. The STROBE checklist is best used in conjunction with this article (freely available on the Web sites of PLoS Medicine at <http://www.plosmedicine.org/>, Annals of Internal Medicine at <http://www.annals.org/>, and Epidemiology at <http://www.epidem.com/>). Information on the STROBE Initiative is available at [www.strobe-statement.org](http://www.strobe-statement.org).



## Sondaggio AICCA

**Grazie per aver deciso di partecipare a questo sondaggio, di seguito troverà una serie di domande di facile comprensione. Il suo supporto e il suo tempo sono fondamentali ai fini della ricerca.**

### 1. Sesso

- Maschio
- Femmina

### 2. Età

### 3. Con chi vive?

- Solo
- Con i genitori
- Con la famiglia
- Altro (specificare)

### 4. Ha figli?

- Sì
- No

### 5. Se Sì, quanti?

### 6. Titolo di studio

- Dottorato di ricerca o specializzazione post laurea
- Laurea/Diploma universitario
- Diploma scuola media superiore
- Licenza scuola media inferiore
- Licenza elementare

1  
2  
3  
4  
5  
6  
7  
8  
9  
10  
11  
12  
13  
14  
15  
16  
17  
18  
19  
20  
21  
22  
23  
24  
25  
26  
27  
28  
29  
30  
31  
32  
33  
34  
35  
36  
37  
38  
39  
40  
41  
42  
43  
44  
45  
46  
47  
48  
49  
50  
51  
52  
53  
54  
55  
56  
57  
58  
59  
60  

## 7. Professione

- Direttivo, quadro
- Impiegato, intermedio
- Capo operaio, operaio subalterno
- Apprendista
- Libero professionista
- Disoccupato
- Altro (specificare)

## 8. Ha un credo religioso?

- Sì
- No

## 9. Se Sì, quale?

- Cristiano-cattolico
- Cristiano-protestante
- Ebraico
- Musulmano
- Altro (specificare)

**Le informazioni delle prossime tre domande devono riferirsi a misurazioni prese dal medico curante**

10. Peso (solo una risposta)

Rilevato senza vestiti in Kg

Rilevato con i vestiti in Kg

11. Altezza in cm

12. Quanto misura la sua circonferenza addominale in cm? (misurata senza vestiti con un metro da sarta a livello dell'ombelico senza trattenere il respiro)

1  
2  
3 13. Lei fuma?  
4

5  Sì

6  No  
7  
8  
9

10 14. Se sì, quante sigarette fuma al giorno?

11  Meno di 5 sigarette al giorno

12  Da 5 a 9 sigarette al giorno

13  Da 10 a 14 sigarette al giorno

14  Da 15 a 19 sigarette al giorno

15  Da 20 a 24 sigarette al giorno

16 25 sigarette al giorno o più  
17  
18  
19  
20  
21  
22

23 15. Se sì, ha mai cercato di smettere di fumare?  
24

25  Sì

26  No  
27  
28  
29

30 16. Ha mai fatto uso di droghe?  
31

32  No

33  1 sola volta

34  Saltuariamente

35  Con regolarità  
36  
37  
38  
39

40 17. Se sì, che tipo di droghe?  
41

42  Cannabis

43  Cocaina

44  Metanfetamine

45  Eroina

46  Altro (specificare)  
47  
48  
49  
50

51   
52  
53  
54  
55  
56  
57  
58  
59  
60

1  
2  
3  
4  
5 18. Pratica regolarmente attività fisica?  
6

7  Sì

8  
9  No  
10

11  
12 19. Se sì, che tipo di attività fisica svolge?  
13

14 (possibile dare più di una risposta)  
15

16  Corsa

17  Passeggiate all'aria aperta

18  Calcio o calcetto

19  Palestra

20  Piscina

21  Bicicletta

22  Altro (specificare)  
23  
24  
25  
26  
27  
28

29   
30  
31

32 20. Se pratica attività fisica, quanti giorni a settimana?  
33

34  Tutti i giorni della settimana

35  Alcuni giorni (indicare il numero nella casella sottostante)

36  Solo il fine settimana  
37  
38  
39

40 Se ha indicato "alcuni giorni", specifichi in numero

41   
42  
43

44 21. Se pratica attività fisica, ogni volta che la fa per quante ore?  
45

46  Meno di un'ora

47  Un'ora

48  Due ore

49  Più di due ore  
50  
51  
52  
53  
54  
55  
56  
57  
58  
59  
60

1  
2  
3 22. Se non pratica attività fisica, ci indichi il perché

- 4  Sconsigliato  
5  
6  Mancanza di voglia  
7  
8  Non ce la faccio  
9  
10  Ho paura  
11  
12  Altro (specificare)

13

14

15

16 23. Se le è stata sconsigliata l'attività fisica, da chi?

- 17  
18  Medico di base  
19  
20  Cardiologo  
21  
22  Familiari  
23  
24  Altro (specificare)

25

26

27

28

29

30

31

32

33

34

35

36

37

38

39

40

41

42

43

44

45

46

47

48

49

50

51

52

53

54

55

56

57

58

59

60

1  
2  
3  
4  
5 24. Dopo un ricovero in ospedale ha mai fatto un periodo in un centro di riabilitazione?  
6

7 Si

8  
9 No

10  
11  
12 25. Se Sì, lo ha trovato utile?  
13

14 Si

15  
16 No

17  
18  
19 26. Se no, pensa che sarebbe stato utile?  
20

21 Si

22  
23 No

24  
25  
26 27. Se no, per quale motivo?  
27

28 Non le è stato proposto

29 Le è stato proposto, ma ha rifiutato

30  
31 Altro (specificare)  
32  
33  
34  
35  
36  
37  
38  
39

40 28. Calcolando tutti i suoi spostamenti a piedi, per quanto tempo ritiene di camminare al giorno?  
41

42 Meno di 30 minuti

43 Dai 30 a 60 minuti

44 Più di 60 minuti  
45  
46  
47  
48  
49  
50  
51  
52  
53  
54  
55  
56  
57  
58  
59  
60

1 29. Secondo Lei fa abbastanza movimento durante il giorno?  
2

3  Sì

4  No  
5  
6

7  
8 30. Durante la cena, solitamente assume  
9

10 (possibile dare più di una risposta)  
11

12  Un primo

13  Un secondo

14  Un contorno

15  Pane

16  Dolce

17  Frutta

18  Niente

19  Panino / Tramezzino

20  Pizza / Piadina/Focaccia

21  Acqua

22  Vino

23  Birra

24  Caffè

25  Altro (specificare)  
26  
27  
28

29  
30  
31  
32  
33  
34  
35  
36  
37  
38  
39  
40

41 31. Lei normalmente beve acqua

42  Proveniente dal rubinetto

43  Imbottigliata  
44  
45  
46  
47

48 32. Quanti litri d'acqua beve al giorno?  
49

50  Mezzo litro

51  Un litro

52  Due o più litri  
53  
54  
55  
56  
57  
58  
59  
60



1  
2  
3 33. Assume bevande zuccherate per più di 3 volte alla settimana?

4  Sì

5  No

6  
7  
8  
9  
10

11 34. Assume bevande alcoliche?

12

13 Sì

14 No

15  
16  
17  
18 35. Se Sì, tutti i giorni della settimana?

19

20 Sì

21 No

22  
23  
24 36. Se assume bevande alcoliche, quali delle seguenti assume durante la giornata (pranzo+cena)?

25  
26  
27 1

28 2

29 3

30 Più di 3

31 Birra (unità di misura =  
32 Bottiglia 33 cl)

33 Vino (unità di misura  
34 = Bicchiere 125 ml)

35 Superalcolico (unità di  
36 misura = Bicchiere 40  
37 ml)

38 Cocktail alcolico (unità  
39 di misura = Bicchiere 40  
40 ml)

41 Altro (specificare)

42

43  
44  
45  
46  
47 37. Lei ha mai pensato che il suo consumo di alcol fosse eccessivo?

48

49 Sì

50

51 No

52

53  
54

1  
2  
3  
4  
5 38. La sera Lei generalmente

6 Esce

7  
8 Rimane a casa (a vedere la tv, leggere, etc.)  
9

10  
11  
12 39. Se esce, le capita di bere...

13 Niente

14 Birra

15  
16  
17 Vino

18  
19 Bevanda analcolica

20  
21 Superalcolico

22  
23 Cocktail alcolico

24  
25 Altro (specificare)  
26  
27  
28  
29  
30  
31  
32  
33  
34  
35  
36  
37  
38  
39  
40  
41  
42  
43  
44  
45  
46  
47  
48  
49  
50  
51  
52  
53  
54  
55  
56  
57  
58  
59  
60

1  
2  
3  
4  
5 40. Quanto crede di essere informato sulla sessualità?  
6

- 7  Molto  
8  Abbastanza  
9  Sufficientemente  
10  Poco  
11  Per nulla  
12  
13  
14  
15  
16

17 41. Come definirebbe la Sua vita sessuale?  
18

- 19  Intensa  
20  Buona  
21  Sufficiente  
22  Scarsa  
23  Nulla  
24  
25  
26  
27  
28  
29

30 42. Se scarsa o nulla, quali sono le cause?  
31

- 32  Mancanza di un partner  
33  Inesperienza / Incapacità  
34  Paura legata alla cardiopatia  
35  Non è importante per me  
36  Altro (specificare)  
37  
38  
39  
40

41   
42  
43

44 43. Fa uso di anticoncezionali?  
45

- 46  Sì  
47  No  
48  
49  
50  
51  
52  
53  
54  
55  
56  
57  
58  
59  
60

1  
2  
3  
4  
5  
6  
7  
8  
9  
10  
11  
12  
13  
14  
15  
16  
17  
18  
19  
20  
21  
22  
23  
24  
25  
26  
27  
28  
29  
30  
31  
32  
33  
34  
35  
36  
37  
38  
39  
40  
41  
42  
43  
44  
45  
46  
47  
48  
49  
50  
51  
52  
53  
54  
55  
56  
57  
58  
59  
60

44. Se si quali?

Condom (preservativo)

Pillola

Diaframma

Altro (specificare)

45. Assume regolarmente farmaci?

Sì

No

46. Se Sì, quali farmaci?

**(possibile più di una risposta)**

Diuretici

Antiaritmici

Anticoagulanti

Aspirina

Antipertensivi

Altro (specificare)

47. Fa uso dei seguenti prodotti?

Sì

No

Integratori

Prodotti di erboristeria

48. Si è mai dimenticato di assumere i farmaci?

Sì

No

1 49. E' occasionalmente poco attento nell'assunzione dei farmaci?

2 Si

3 No

4  
5  
6  
7  
8 50. Quando si sente meglio, a volte interrompe la terapia?

9 Si

10 No

11  
12  
13  
14  
15 51. Quando si sente peggio, a volte interrompe la terapia?

16 Si

17 No

18  
19  
20  
21 52. In generale, direbbe che la sua salute è

22 Eccellente

23 Molto buona

24 Buona

25 Passabile

26 Scadente

# BMJ Open

## Lifestyles and determinants of perceived health in Italian grown-up/adult congenital heart patients: A cross-sectional and pan-national survey

|                                 |                                                                                                                                                                                                                                                            |
|---------------------------------|------------------------------------------------------------------------------------------------------------------------------------------------------------------------------------------------------------------------------------------------------------|
| Journal:                        | <i>BMJ Open</i>                                                                                                                                                                                                                                            |
| Manuscript ID                   | bmjopen-2019-030917.R2                                                                                                                                                                                                                                     |
| Article Type:                   | Original research                                                                                                                                                                                                                                          |
| Date Submitted by the Author:   | 06-Sep-2019                                                                                                                                                                                                                                                |
| Complete List of Authors:       | Dellafiore, Federica; IRCCS Policlinico San Donato caruso, rosario; IRCCS Policlinico San Donato, Arrigoni, Cristina; University of Pavia Flocco, Serena; IRCCS Policlinico San Donato Giamberti, Alessandro Chessa, Massimo; IRCCS Policlinico San Donato |
| <b>Primary Subject Heading</b>: | Cardiovascular medicine                                                                                                                                                                                                                                    |
| Secondary Subject Heading:      | Nursing, Mental health, Public health                                                                                                                                                                                                                      |
| Keywords:                       | Congenital heart disease < CARDIOLOGY, Adult cardiology < CARDIOLOGY, MENTAL HEALTH                                                                                                                                                                        |
|                                 |                                                                                                                                                                                                                                                            |

SCHOLARONE™  
Manuscripts

1  
2  
3 *Title*  
4

5 **Lifestyles and determinants of perceived health in Italian grown-up/adult**  
6  
7 **congenital heart patients: A cross-sectional and pan-national survey**  
8  
9

10  
11  
12 *Authors*

13 Federica DELLAFIORÉ<sup>1</sup>, PhD, RN; Rosario CARUSO<sup>1</sup>, PhD, RN; Cristina ARRIGONI<sup>2</sup>, RN,  
14 MSc; Serena Francesca FLOCCO<sup>3</sup>, RN; Alessandro GIAMBERTI<sup>3</sup>, MD; Massimo CHESSA<sup>3</sup>, MD,  
15 PhD  
16

17  
18  
19  
20 *Affiliations*

- 21 1. Health Professions Research and Development Unit, IRCCS Policlinico San Donato, San  
22 Donato Milanese, Milan, Italy  
23  
24 2. Department of Public Health, Experimental and Forensic Medicine, Section of Hygiene,  
25 University of Pavia, Pavia, Italy  
26  
27 3. Pediatric and Adult Congenital Heart Disease Center, IRCCS Policlinico San Donato, San  
28 Donato Milanese, Milan, Italy  
29  
30  
31  
32

33 **Corresponding author**

34 Rosario Caruso, PhD, RN  
35 Head of Health Professions Research and Development Unit  
36 IRCCS Policlinico San Donato  
37 Via Agadir, 20-24  
38 20097 San Donato Milanese, Italy  
39 Phone: +39 0252774940  
40 Email: [rosario.caruso@unimi.it](mailto:rosario.caruso@unimi.it)  
41  
42  
43  
44

45 **Acknowledgements.** We wish to thank all the study participants, patient advisers and the  
46  
47 ‘Associazione Italiana Cardiopatici Congeniti Adulti’ (AICCA).  
48  
49  
50  
51  
52  
53  
54  
55  
56  
57  
58  
59  
60

## Abstract

**Objectives:** To provide the first epidemiological lifestyle descriptions of the Italian grown-up/adult congenital heart (GUCH/ACHD) population by identifying the determinants of poor perceived health status. **Design:** Cross-sectional pan-national survey. **Setting:** Italian GUCH/ACHD patients who were members of the Italian Association of GUCH/ACHD. **Primary and secondary outcome measures:** To discuss these lifestyle descriptions through an *ad hoc* developed questionnaire and health perceptions (i.e., mental and physical health perception) through an SF-12 questionnaire. **Results:** 629 patients included; many investigated GUCH/ACHD lifestyles were determined similar to those of the general population—with the exception of the smoking habits, which were lower. The odds of the occurrence of inadequate physical health perceptions increased by more than two times in patients undergoing antiarrhythmic therapies (OR adjusted = 2.045; 95% CI = 1.201-3.479; P = 0.008; n=629), more than 1.5 times in patients taking oral anticoagulants (OR adjusted = 1.638; 95% CI = 1.038-2.585; P = 0.034; n=629), and roughly 1.7 times in patients treated with antiplatelets (OR adjusted = 1.743; 95% CI = 1.024-2.966; P = 0.041; n=629). The odds of the occurrence of inadequate mental health perceptions increased by 1.7% for every year that the patients aged (OR adjusted = 1.017; 95% CI = 1.002-1.032; P = 0.025; n=629). **Conclusion:** Particular attention should be paid to these aging patients' increasing psychological needs, and additional research is needed to identify associations between their lifestyles and clinical outcomes.

**Keywords:** congenital heart disease; grown-up congenital heart; health perception; lifestyles; survey.



1  
2  
3  
4  
5  
6  
7  
8  
9  
10  
11  
12  
13  
14  
15  
16  
17  
18  
19  
20  
21  
22  
23  
24  
25  
26  
27  
28  
29  
30  
31  
32  
33  
34  
35  
36  
37  
38  
39  
40  
41  
42  
43  
44  
45  
46  
47  
48  
49  
50  
51  
52  
53  
54  
55  
56  
57  
58  
59  
60

## Strengths and limitations of this study

- The study results require caution regarding their generalization, as lifestyle trajectories over time were not described due to the cross-sectional approach taken for the data collection process.
- The self-report approach taken during the clinical information collection requires caution, as a direct assessment of the respondents' actual clinical conditions was not performed to collect data.
- The sampling was performed using the contacts of the Italian Association of GUCH/ACHD (AICCA); therefore, a slight overestimation of the healthy lifestyle is possible, acknowledging that the AICCA patient-members may become more engaged in their treatment than may other patients.
- The questionnaire used in this survey to investigate lifestyles (*ad hoc* developed questionnaire) was validated for content and face validity, while the questionnaire that investigates health perceptions possesses well-known validity proprieties (SF-12).
- The surveyed patients equally represent Northern, Central, and Southern Italy.

## Introduction

Roughly 85% of children with congenital heart disease (CHD) live to adulthood and thus represent the population of grown-up/adult congenital heart disease (GUCH/ACHD) patients.<sup>1</sup> More precisely, the GUCH/ACHD rate has been growing steadily, even if accurate data on the size and characteristics of this population remain lacking.<sup>2</sup> Even if the large variety of CHD and its clinical problems require specific focus for improving the GUCH/ACHD clinical condition, this population also shares a number of important communalities mainly related to the modifiable risk factors of a decline in clinical status. Among these modifiable risk factors, lifestyle plays a pivotal role in improving the overall health conditions associated with GUCH/ACHD.<sup>3</sup> Further, the descriptions of these patients' socio-demographic and clinical determinants of their perceived health statuses play a paramount role in framing a comprehensive understanding of the actual weaknesses present in the educational plans and follow-ups. Specific interventions in the determinants of poor perceived health status may be useful for achieving the most favourable outcomes in the GUCH/ACHD population, as has been previously described for other chronic conditions, such as diabetes and acquired heart diseases.<sup>4-7</sup>

Thus far, the determinants of perceived health status among GUCH/ACHD patients remain poorly described on a global scale, despite their possible influence on the patients' overall adherence to follow-ups and, consequently, on patients' outcomes.<sup>8</sup> In Italy, neither lifestyles nor determinants of perceived health status among GUCH/ACHD patients have been previously for large samples, thus undermining the possibility of planning mid- and long-term strategies for patients who report poor perceived health or inadequate lifestyles. For these reasons, this study aimed to provide the first epidemiological lifestyle descriptions of the Italian GUCH/ACHD population by identifying the determinants of poor perceived health status.

## Material and methods

### *Design, study population and data collection*

This cross-sectional survey was promoted by an Italian GUCH/ACHD centre and supported by the Italian Association of GUCH/ACHD (AICCA). The study design and reporting method aligned with the ‘STrengthening the Reporting of OBservational studies in Epidemiology’ (STROBE) checklist (supplementary file 1). Data were collected through the list of contacts available in the AICCA’s repository between March and October 2017. More precisely, data were collected using a computer/mobile-assisted, web interviewing survey, and participants were sampled via the repertory of contacts of AICCA contacts and stratified to reflect the geo-graphical population by macro-area (i.e., Northern, Central and Southern Italy).

According to the study protocol (approved by the Ethical Committee of San Raffaele Hospital, Prot. N. 111/INT/2016), all patients were informed on the study’s aim and provided consent flagging an electronic form, whereas it was considered implicit due to their voluntarily and anonymously completion of the questionnaire.

### *Validation of the questionnaire on lifestyles*

The development of this study’s lifestyle questionnaire was based on a previous survey of the Italian National Institute of Public Health on the chronic disease population,<sup>9</sup> adapted using a process of face and content validity to detect the peculiarities of GUCH/ACHD. Accordingly, the questionnaire’s validation required the involvement of a multi-disciplinary panel of experts (n=14) to ascertain the new questionnaire’s face and content validity. The panellists (9 females; 35.7%) were aged a median of 44.6 years (interquartile range = 7.4 years), had a minimum of 4 years of experience in CHD field, and comprised the following professions: cardiac surgeons (n=2), clinical nutritionists (n=2), clinical psychologists (n=2), clinical cardiologists (n=2), clinical nurses (n=2), experts of public health (n=2), experts in instrument development with a background in nursing at the doctoral level (n=2). Precisely, face validity explored the panellists’ understanding of each item and their comments about the overall concept they purported to measure through an assessment

1  
2  
3 executed using open-ended questions. Conversely, content validity refers to the ‘quantitative’  
4  
5 agreement among panellists regarding how pertinent each item is in relation to the aim of its  
6  
7 measurement.  
8  
9

10 Content validity encompassed the panellists’ quantitative assessments using the content  
11  
12 validity ratio (CVR), and the content validity index for item and scale level (I-CVIs and S-CVI).  
13  
14 The CVR may potentially range between -1 (perfect disagreement among panelists) and +1 (perfect  
15  
16 agreement among panelists), while I-CVIs and S-CVI range between 0 (no content judged as  
17  
18 appropriate) and +1 (content totally judged as appropriate). As per the critical CVR cut-offs for  
19  
20 determining adequate/inadequate content indices (i.e., the lowest level of CVR such that the level of  
21  
22 agreement was greater than 50%), recent research was proposed to consider critical CVR values as  
23  
24 the statistics arising from binomial distribution that are applied to the panel sizes.<sup>10</sup> A critical CVR  
25  
26 value for 14 panelists is equal to 0.571;<sup>10</sup> as per I-CVIs, an adequate index must be equal or  
27  
28 superior to 0.75, while S-CVI must be equal or superior to 0.70.<sup>11</sup>  
29  
30  
31  
32

33 The first round of content validity was performed in June 2016 and was based on the  
34  
35 questionnaire proposed by the Italian National Institute of Public Health.<sup>9</sup> Thus, the panellists were  
36  
37 asked to propose modifications insofar as adequate for developing a questionnaire for the specific  
38  
39 GUCH/ACHD population. After four rounds of consulting the panellists and amending the  
40  
41 questionnaire, all CVR values were higher than 0.65, I-CVIs were equal or higher than 0.80, and S-  
42  
43 CVI was equal to 0.75. Further, the questionnaire was preliminarily tested on a small group of six  
44  
45 patients to evaluate the clarity of each item. Patients were asked to respond to a three-point Likert  
46  
47 scale (1=completely not understandable; == somewhat understandable; 3=completely  
48  
49 understandable) and an open-ended question to investigate the need for an eventual re-wording of  
50  
51 the terminology. We computed the Fleiss’ kappa to determine the level of quantitative agreement  
52  
53 between patients, which was 0.75 and indicated consensus in their defining of the questionnaire as  
54  
55 understandable, although some minor amendments to the items’ wording were requested as per the  
56  
57 answers to the open-ended question. Finally, the questionnaire validation process was concluded in  
58  
59  
60

1  
2  
3 January 2017 (supplementary file 2). The survey required roughly thirty minutes for its completion,  
4  
5 and no respondent received compensation for participating in this study.  
6

### 7 8 *Measurements*

9  
10 The online survey collected the main socio-demographic and clinical characteristics of  
11  
12 GUCH/ACHD patients, including their lifestyles and perceived health statuses.  
13

14 Specifically, each participant's socio-demographic and clinical characteristics include sex,  
15  
16 age, family composition, working role, educational background, provenience, body mass index  
17  
18 (BMI), and therapeutic plan. The lifestyles investigations revealed patients' dietary habits,  
19  
20 substance use or abuse (e.g., smoking, drugs), and physical and sexual activities. Conversely, their  
21  
22 perceived health statuses were assessed using SF-12,<sup>12</sup> which has notably been successfully  
23  
24 developed as a shorter version of the SF-36 in nine European countries and demonstrates adequate  
25  
26 validity in measuring the physical and mental components of health.<sup>12</sup> Thus, these components were  
27  
28 respectively labelled physical component summary (PCS) and mental component summary (MCS),  
29  
30 both of which were scored from 0-100 using the procedure indicated by the authors of reference,  
31  
32 wherein a higher value indicates a more favourable health perception.<sup>12</sup> Further, it is possible to  
33  
34 dichotomize the scores through an adequate versus an inadequate health perception if we consider  
35  
36 the median split strategy<sup>13</sup> and acknowledge that the median scores of general Italian population,  
37  
38 clustered by different age ranges, were previously described.<sup>14</sup>  
39  
40  
41  
42  
43

### 44 *Statistical analysis*

45  
46 We calculated the response rate by considering the invitations sent to the contacts provided  
47  
48 by the AICCA. All the collected variables were preliminary checked for possible missing data,  
49  
50 outliers, or errors using an analysis of frequency distribution. Categorical variables were described  
51  
52 using frequency and percentage, while quantitative variables were assessed for normality via  
53  
54 skewness and kurtosis analysis, followed by Shapiro-Wilk test. According to the quantitative  
55  
56 variable distributions, we employed mean  $\pm$  standard deviation (SD) or median and interquartile  
57  
58 range (IQR) to describe these variables. The univariate analysis was based on multiple comparisons  
59  
60

1  
2  
3 of the lifestyles, ongoing treatments, PCSs, and MCSs between the sub-groups defined by the socio-  
4 demographic characteristics. According to the nature of each variable, the comparisons were  
5 performed using the following possible tests:  $\chi^2$  test or Fisher exact test (when appropriate), Mann-  
6 Whitney U test or Kruskal-Wallis H test (for non-normally distributed variables), t-test or one-way  
7 ANOVA (for normally distributed variables). Variables exhibiting significant differences were  
8 evaluated to be used as predictors of inadequate PCS and MCS. A median split approach was used  
9 to dichotomize PCS and MCS,<sup>13</sup> by considering the median values previously described among  
10 Italians aged between 18 and 44 years.<sup>14</sup> Accordingly, PCS scores lower than 52.5 were considered  
11 as indicating inadequate physical health, while MCS scores lower than 51.2 were considered as  
12 indicating inadequate mental health. Subsequently, PCS and MCS were employed as dichotomous  
13 outcomes in two logistic regression (LR) models. The LR models were assessed for the possible  
14 collinearity between the independent variable by checking the strength of their bivariate  
15 associations, which should not exceed 0.45.<sup>15</sup> Maximum likelihood estimation was used to  
16 determine the unknown LR model parameters through the generalized linear model function of R,  
17 while the goodness of fit was determined with the Hosmer-Lemeshow test (non-significant P  
18 indicates a good fit), and Nagelkerke's pseudo- $R^2$ . The independent variables were simultaneously  
19 entered into the models to examine each variable's relatively unique contribution to health  
20 perception. Significance levels were set using  $\alpha = 5\%$ . Overall, missing data referred to the socio-  
21 demographic section were managed using pairwise deletions, while no missing data were expected  
22 in the answering of the questionnaire, as all the questions were mandatory to complete the survey.  
23 Statistical analysis was run through Statistical Package for the Social Sciences (SPSS) version 22  
24 (IBM Corporation) and R Statistical Package (R Foundation for Statistical Computing).

#### 25 *Patient and public involvement*

26 Neither patients nor the public were involved in the designing of this research, although both  
27 will be informed of the survey results via the AICCA network. Accordingly, the authors will  
28 employ the AICCA's support to disseminate the study results.  
29  
30  
31  
32  
33  
34  
35  
36  
37  
38  
39  
40  
41  
42  
43  
44  
45  
46  
47  
48  
49  
50  
51  
52  
53  
54  
55  
56  
57  
58  
59  
60

## Results

The response rate was 89.7% (626 responses out of 698 invitations). Missing data were reported only for the provenience (n=3; 0.4%), BMI (n=1), education (n=3; 0.1%), and occupation (n=2; 0.3%). **Table 1** illustrates the participants' socio-demographic characteristics, lifestyles, ongoing treatments and health perceptions. Roughly one of every five patients (n=106; 18.1%) declared to be lowly adherent to their ongoing medical treatment. Patients were primarily treated with oral anticoagulants (n=162; 25.9%), antiarrhythmic drugs (n=121; 19.3%), diuretics (n=104; 16.6%), antiplatelet therapy (n=87; 13.9%), antihypertensive drugs (n=81; 12.9%), and dietary supplements (n=160; 25.6%).

The physical health (PCS12) scores reached a mean (SD) equal to  $48.69 \pm 8.96$ , which was higher than that of mental health (MCS12;  $45.56 \pm 10.99$ ). Overall, the adequate physical and mental health scores were 53.6% (n=337) and 63.8% (n=401), respectively.

----Please, insert Table 1 ----

Differences of the variables described in Table 1 between adequate and inadequate physical health were significant considering diuretics ( $\chi^2=22.9$ ; d.f.=1;  $P<0.001$ ), antiarrhythmic drugs ( $\chi^2=28.1$ ; d.f.=1;  $P<0.001$ ), anticoagulants ( $\chi^2=21.2$ ; d.f.=1;  $P<0.001$ ), antiplatelet drugs ( $\chi^2=11.1$ ; d.f.=1;  $P=0.001$ ), antihypertensive drugs ( $\chi^2=10.4$ ; d.f.=1;  $P=0.001$ ), BMI ( $\chi^2=8.4$ ; d.f.=3;  $P=0.033$ ), and age ( $t=4.1$ ; d.f.=610;  $P<0.001$ ). Conversely, differences of the same variables between adequate and inadequate mental health were significant considering diuretics ( $\chi^2=20.1$ ; d.f.=1;  $P<0.001$ ), antiarrhythmic drugs ( $\chi^2=22.7$ ; d.f.=1;  $P<0.001$ ), anticoagulants ( $\chi^2=19.2$ ; d.f.=1;  $P<0.001$ ), antiplatelet drugs ( $\chi^2=10.2$ ; d.f.=1;  $P=0.002$ ), antihypertensive drugs ( $\chi^2=9.4$ ; d.f.=1;  $P=0.003$ ), and age ( $t=-2.3$ ; d.f.=610;  $P=0.011$ ).

As **Table 2** indicates, the odds of inadequate physical health perception increased by more than two times in patients receiving antiarrhythmic therapy (OR adjusted = 2.045; 95% CI = 1.201-3.479;  $P = 0.008$ ; n=629), more than 1.5 times in patients receiving oral anticoagulants (OR adjusted = 1.638; 95% CI = 1.038-2.585;  $P = 0.034$ ; n=629), and roughly 1.7 times in patients

1  
2  
3 treated with antiplatelets (OR adjusted = 1.743; 95% CI = 1.024-2.966; P = 0.041; n=629).

4  
5 Conversely, as per **Table 3**, the odds of inadequate mental health perception increased by roughly  
6  
7 2% for each year a participant aged (OR adjusted = 1.017; 95% CI = 1.002-1.032; P = 0.025;  
8  
9 n=629).

10  
11  
12 ----Please, insert Table 2 ----

13  
14  
15 ----Please, insert Table 3 ----

## 16 17 **Discussion**

18  
19 This study represents the first overview in Italy of ACHD/GUCH patients' lifestyles by  
20  
21 identifying determinants of poor perceived health status. Our results are strategic considering that  
22  
23 they allow a comparison between the general population's lifestyles and those of ACHD/GUCH  
24  
25 patients. These possible comparisons are particularly worthy considering that the majority of  
26  
27 patients born with CHD are expected to survive into adulthood, being exposed to the general risks  
28  
29 of inadequate lifestyles (i.e. modifiable cardiovascular risks).<sup>16</sup> Further, this study contributes to  
30  
31 identify potentially important determinants of poor physical and mental health and focuses attention  
32  
33 onto patients who present those determinants.  
34  
35  
36

37  
38 This study highlights that associations exist between antiarrhythmic drugs, oral  
39  
40 anticoagulants, antiplatelet drugs, and lower physical health status. To the best of our knowledge, this  
41  
42 study provides the first empirical evidence of these associations in the GUCH/ACHD population.  
43  
44 Previous research has demonstrated similar results in patients with paroxysmal atrial fibrillation,  
45  
46 wherein patients treated with antiarrhythmic drugs reported lower physical health than did patients  
47  
48 treated with radiofrequency ablation.<sup>17</sup> Even if the literature does not fully address the question of  
49  
50 whether or not physical health is directly associated with antiarrhythmic drugs in patients with atrial  
51  
52 fibrillation,<sup>17</sup> there is room in the clinical practice for monitoring the physical health trajectories of  
53  
54 patients treated with antiarrhythmic drug over time. Similar associations with a decreased quality of  
55  
56 life and physical health were described in patients treated with anticoagulants and/or antiplatelet  
57  
58 drugs,<sup>18</sup> even if little is currently known in GUCH/ACHD population about the effects of these drugs  
59  
60



1  
2  
3 on physical and mental health statuses.<sup>19</sup> These associations should be studied in future research, and  
4 possible manifestations of side effects should be monitored to understand whether the worsening of  
5 one's physical health is related to the drug-related side effects or other factors, such as the  
6 psychological burden related to one's need for medical therapy in terms of posology and adherence.  
7  
8  
9  
10  
11

12 As described above, our results profile patients who are at greater risk for achieving  
13 inadequate physical health in consideration of their ongoing treatments. Conversely, mental health  
14 status seems to worsen as individuals age, which may be related to many GUCH/ACHD patients'  
15 previously described fear of ageing, that is enhanced by a sense of uncertainty;<sup>20</sup> in other words, the  
16 GUCH/ACHD population's psychological needs increase with age.  
17  
18  
19  
20  
21  
22

23 An unexpected result was related to the rates of reported physical activities, which were  
24 consistent with those described for the general population.<sup>21</sup> Our initial expectation was to identify a  
25 lower rate of physical activity in GUCH/ACHD patients, because past clinicians restricted patients'  
26 activity due to concerns that increased activity might be risky for patients' health.<sup>22</sup> Over the last ten  
27 years, the recommendations from a consensus of an international expert panel endorsed by the  
28 European Society of Cardiology (ESC) encourage that all CHD patients regularly exercise; while  
29 these recommendations are mainly based on expert opinion, there nevertheless exists scarce evidence  
30 for the effects of exercise training.<sup>23</sup> Our results confirm the shifting of paradigm from the restriction  
31 of physical activities to its support of educational advices. Accordingly, the steady progress in  
32 GUCH/ACHD diagnostics emphasize the life-long benefits of regular physical activity for general  
33 health as well as in complex CHD (adequately adherent to the follow-ups).<sup>24</sup>  
34  
35  
36  
37  
38  
39  
40  
41  
42  
43  
44  
45  
46  
47  
48

49 Overall, our sample reported an adequate BMI that was slightly lower than previous  
50 epidemiological, self-report BMI assessments of the Italian general population aged between 30 and  
51 45 years.<sup>25</sup> The other socio-demographic characteristics are consistent with the current data regarding  
52 general population.<sup>25,26</sup> Concerning lifestyles, the rate of smokers among the GUCH/ACHD sample  
53 (10.4%) appears to be encouragingly lower than that reported in general population (21.4%)<sup>27</sup> as well  
54 as that determined by a recent description in Malta.<sup>28</sup> This result may be related to the clinicians' high  
55  
56  
57  
58  
59  
60

1  
2  
3 sensibility when providing regular anti-smoking advice and education. Cannabis consumption, on the  
4  
5 other hand, appears to be consistent with and slightly higher than the general population's rate of self-  
6  
7 reported consumption.<sup>29</sup> This result is also in line with previous evidence of younger adults with  
8  
9 CHD, whose behaviours were described as being more strongly influenced by peer relationships than  
10  
11 the awareness of one's clinical condition.<sup>30</sup> Clinicians should address this aspect with increasing  
12  
13 attention to reduce illicit drug consumption by administering to the GUCH/ACHD population  
14  
15 detailed information that highlights the risk of increased systolic blood pressure, orthostatic  
16  
17 hypotension, and ischemic stroke.<sup>31</sup>

### 21 *Limitations*

22  
23  
24 This study's findings are subject to some important limitations. Firstly, the impossibility of  
25  
26 collecting reliable clinical data (e.g., CHD classification, diagnostics) undermined the possibility of  
27  
28 drawing solid, inferential associations between lifestyles (behaviours) and clinical outcomes. For  
29  
30 this reason, this study has mainly provided descriptive information to frame new knowledge of the  
31  
32 Italian GUCH/ACHD population's lifestyles. Secondly, we suspect the possibility that the levels of  
33  
34 risky behaviours were underestimated and the levels of healthy behaviours were overestimated  
35  
36 according to the potential social desirability effect's occurrence in the participants' responses.  
37  
38 However, the choice to anonymously collect data should have limited the probability that the social  
39  
40 desirability effect would occur. Thirdly, data collection was performed using the AICCA network,  
41  
42 which may have introduced a bias in the sampling procedure because patients from the AICCA—  
43  
44 that is, patients who have learned skills of observation, description, and symptom handling, thus  
45  
46 increasing their basic knowledge of health problems—may have more likely been 'activated' than  
47  
48 general patients and because they were not representative of the general population. We believe this  
49  
50 sampling bias is generally marginal in this study, as the AICCA holds the contacts of real-world  
51  
52 patients from the majority of CHD centres in Italy, and not all patients in the AICCA network  
53  
54 actively participate in the association's initiative. Fourthly, this study has included no information  
55  
56 on the possible manifestations of drug-related side effects or other factors that may interact through  
57  
58  
59  
60

1  
2  
3 the relationship between drugs and physical health, which such information might help effectively  
4 interpret. Overall, considering this study's limitations, we suggest that caution be taken when  
5 generalizing the results. This study's strengths are related firstly to the fact that patients roughly  
6  
7  
8  
9  
10  
11  
12  
13  
14  
15  
16  
17  
18  
19  
20  
21  
22  
23  
24  
25  
26  
27  
28  
29  
30  
31  
32  
33  
34  
35  
36  
37  
38  
39  
40  
41  
42  
43  
44  
45  
46  
47  
48  
49  
50  
51  
52  
53  
54  
55  
56  
57  
58  
59  
60

equally represent Northern, Central, and Southern Italy and secondly to the prudent approach used to analyse the data.

## Conclusions

Thus far, this study represents the first lifestyle descriptions of the Italian GUCH/ACHD population, and we have identified a number of similarities and differences among the general Italian population. Clinicians should address the issue of illicit drug consumption (especially cannabis) more deeply, and particular attention should be paid to accommodating the increasing psychological needs resulting from these patients' age progression. More research is needed to identify the associations between lifestyles and clinical outcomes to determine additional details for homogenous sub-group stratifications in consideration of patients' clinical information, such as CHD classification.

## Author's contributions statement

RC, FD, CA, SFF, AG, and MC: conception and design, FD, SFF, AG and MC was particularly involved in the acquisition of data, RC and CA in analysis and interpretation of data; RC, FD, CA, SFF, AG, and MC have substantially contributed in drafting the manuscript and in providing critical revision of important intellectual content. Each author gave their final approval of the version to be published. Each author should have participated sufficiently in the work to take public responsibility for appropriate portions of the content.

## Competing interests

The authors declare no conflict of interest.

## Funding

This research was partially supported by ‘Ricerca Corrente’ funding from Italian Ministry of Health to IRCCS Policlinico San Donato.

## Data sharing statement

We intend to make data freely available the data upon request to the corresponding author (rosario.caruso@unimi.it).

## References

1. Baumgartner H, Bonhoeffer P, De Groot NMS, et al. ESC Guidelines for the management of grown-up congenital heart disease (new version 2010): The Task Force on the Management of Grown-up Congenital Heart Disease of the European Society of Cardiology (ESC). *Eur Heart J*. 2010;31(23):2915-2957. doi:10.1093/eurheartj/ehq249
2. van der Linde D, Konings EEM, Slager MA, et al. Birth Prevalence of Congenital Heart Disease Worldwide: A Systematic Review and Meta-Analysis. *J Am Coll Cardiol*. 2011;58(21):2241-2247. doi:10.1016/J.JACC.2011.08.025
3. Flocco SF, Caruso R, Dellafiore F, et al. [The effect of the transition care model on health perception among adolescents with congenital heart disease: a quasi-experimental study]. *G Ital Cardiol*. 2018;19(6):386-393. doi:10.1714/2922.29372
4. Dellafiore F, Conte G, Baroni I, et al. Gender differences in heart failure self-care behaviors: do we know enough? *Minerva Med*. 2018;109(5):401-403. doi:10.23736/S0026-4806.18.05579-9
5. Caruso R, Arrigoni C, Magon A, et al. Health determinants in italian type 2 diabetes Mellitus (T2DM) patients: A critical gender differences analysis. *J Res Genet Stud*. 2017;7(2):93–108. doi:10.22381/JRGS7220176

- 1  
2  
3 6. Dellafiore F, Arrigoni C, Pittella F, Conte G, Magon A, Caruso R. Paradox of self-care  
4  
5 gender differences among Italian patients with chronic heart failure: findings from a real-  
6  
7 world cross-sectional study. *BMJ Open*. 2018;8(9):e021966. doi:10.1136/bmjopen-2018-  
8  
9 021966  
10  
11
- 12 7. Caruso R, Magon A, Baroni I, et al. Health literacy in type 2 diabetes patients: a systematic  
13  
14 review of systematic reviews. *Acta Diabetol*. 2017. doi:10.1007/s00592-017-1071-1  
15  
16
- 17 8. Dontje ML, Feenstra M, de Greef MHG, Nieuwland W, Hoendermis ES. Are Grown-ups  
18  
19 with Congenital Heart Disease Willing to Participate in an Exercise Program? *Congenit*  
20  
21 *Heart Dis*. 2014;9(1):38-44. doi:10.1111/chd.12069  
22  
23
- 24 9. Istituto Superiore di Sanità. *Questionario Di Valutazione Degli Stili Di Vita*. Rome; 2015.  
25  
26 [http://old.iss.it/binary/ofad/cont/questionario\\_giovani\\_in\\_forma.1225957648.pdf](http://old.iss.it/binary/ofad/cont/questionario_giovani_in_forma.1225957648.pdf). Accessed  
27  
28 October 5, 2018.  
29
- 30 10. Wilson FR, Pan W, Schumsky DA. Recalculation of the Critical Values for Lawshe's  
31  
32 Content Validity Ratio. *Meas Eval Couns Dev*. 2012;45(3):197-210.  
33  
34 doi:10.1177/0748175612440286  
35  
36
- 37 11. Polit DF, Beck CT, Owen S V. Is the CVI an acceptable indicator of content validity?  
38  
39 Appraisal and recommendations. *Res Nurs Health*. 2007;30(4):459-467.  
40  
41 doi:10.1002/nur.20199  
42  
43
- 44 12. Kodraliu G, Mosconi P, Groth N, et al. Subjective health status assessment: evaluation of the  
45  
46 Italian version of the SF-12 Health Survey. Results from the MiOS Project. *J Epidemiol*  
47  
48 *Biostat*. 2001;6(3):305-316.  
49  
50
- 51 13. DeCoster J, Gallucci M, Iselin A-MR. Best Practices for Using Median Splits, Artificial  
52  
53 Categorization, and their Continuous Alternatives. *J Exp Psychopathol*. 2011;2(2):197-209.  
54  
55 doi:10.5127/jep.008310  
56  
57
- 58 14. Gandek B, Ware JE, Aaronson NK, et al. Cross-validation of item selection and scoring for  
59  
60 the SF-12 Health Survey in nine countries: results from the IQOLA Project. *International*

- 1  
2  
3 Quality of Life Assessment. *J Clin Epidemiol*. 1998;51(11):1171-1178.  
4  
5  
6 15. Dormann CF, Elith J, Bacher S, et al. Collinearity: a review of methods to deal with it and a  
7 simulation study evaluating their performance. *Ecography (Cop)*. 2013;36(1):27-46.  
8  
9 doi:10.1111/j.1600-0587.2012.07348.x  
10  
11  
12 16. Deen JF, Krieger E V, Slee AE, et al. Metabolic Syndrome in Adults With Congenital Heart  
13 Disease. *J Am Heart Assoc*. 2016;5(2). doi:10.1161/JAHA.114.001132  
14  
15  
16 17. Reynolds MR, Walczak J, White SA, Cohen DJ, Wilber DJ. Improvements in symptoms and  
17 quality of life in patients with paroxysmal atrial fibrillation treated with radiofrequency  
18 catheter ablation versus antiarrhythmic drugs. *Circ Cardiovasc Qual Outcomes*.  
19  
20 2010;3(6):615-623. doi:10.1161/CIRCOUTCOMES.110.957563  
21  
22  
23 18. Hasan SS, Teh KM, Ahmed SI, Chong DWK, Ong HC, Naina B. Quality of life (QoL) and  
24 International Normalized Ratio (INR) control of patients attending anticoagulation clinics.  
25  
26  
27  
28  
29  
30  
31  
32  
33 19. Fteropoulli T, Stygall J, Cullen S, Deanfield J, Newman SP. Quality of life of adult  
34 congenital heart disease patients: a systematic review of the literature. *Cardiol Young*.  
35  
36  
37 2013;23(4):473-485. doi:10.1017/S1047951112002351  
38  
39  
40 20. Oliver JM, Gallego P, Gonzalez AE, et al. Impact of age and sex on survival and causes of  
41 death in adults with congenital heart disease. *Int J Cardiol*. 2017;245:119-124.  
42  
43  
44  
45  
46  
47  
48  
49  
50  
51  
52  
53  
54  
55  
56  
57  
58  
59  
60 21. Massidda M, Cugusi L, Mathieu A. Physical activity levels and health-related quality of life  
in young Italian population. *J Sports Med Phys Fitness*. 2015;55(5):506-512.  
22. Tutarel O, Gabriel H, Diller G-P. Exercise: Friend or Foe in Adult Congenital Heart Disease?  
*Curr Cardiol Rep*. 2013;15(11):416. doi:10.1007/s11886-013-0416-9  
23. Hirth A, Reybrouck T, Bjarnason-Wehrens B, Lawrenz W, Hoffmann A. Recommendations  
for participation in competitive and leisure sports in patients with congenital heart disease: a  
consensus document. *Eur J Cardiovasc Prev Rehabil*. 2006;13(3):293-299.

- 1  
2  
3 24. Bassareo PP, Saba L, Solla P, Barbanti C, Marras AR, Mercurio G. Factors Influencing  
4  
5 Adaptation and Performance at Physical Exercise in Complex Congenital Heart Diseases  
6  
7 after Surgical Repair. *Biomed Res Int*. 2014;2014:862372. doi:10.1155/2014/862372  
8  
9  
10 25. Krul AJ, Daanen HAM, Choi H. Self-reported and measured weight, height and body mass  
11  
12 index (BMI) in Italy, the Netherlands and North America. *Eur J Public Health*.  
13  
14 2011;21(4):414-419. doi:10.1093/eurpub/ckp228  
15  
16  
17 26. ISTAT. *Rapporto Annuale 2018*. Rome; 2018. [https://www.istat.it/storage/rapporto-](https://www.istat.it/storage/rapporto-annuale/2018/Rapportoannuale2018.pdf)  
18  
19 [annuale/2018/Rapportoannuale2018.pdf](https://www.istat.it/storage/rapporto-annuale/2018/Rapportoannuale2018.pdf). Accessed October 23, 2018.  
20  
21  
22 27. Lugo A, Zuccaro P, Pacifici R, et al. Smoking in Italy in 2015-2016: Prevalence, Trends,  
23  
24 Roll-your-own Cigarettes, and Attitudes towards Incoming Regulations. *Tumori J*.  
25  
26 2017;103(4):353-359. doi:10.5301/tj.5000644  
27  
28  
29 28. Caruana M, Grech V. Lifestyle Habits among Adult Congenital Heart Disease Patients in  
30  
31 Malta. *Congenit Heart Dis*. 2016;11(4):332-340. doi:10.1111/chd.12366  
32  
33  
34 29. Zuccato E, Castiglioni S, Senta I, et al. Population surveys compared with wastewater  
35  
36 analysis for monitoring illicit drug consumption in Italy in 2010–2014. *Drug Alcohol*  
37  
38 *Depend*. 2016;161:178-188. doi:10.1016/J.DRUGALCDEP.2016.02.003  
39  
40  
41 30. Reid GJ, Webb GD, McCrindle BW, Irvine MJ, Siu SC. Health Behaviors among  
42  
43 Adolescents and Young Adults with Congenital Heart Disease. *Congenit Heart Dis*.  
44  
45 2008;3(1):16-25. doi:10.1111/j.1747-0803.2007.00161.x  
46  
47  
48 31. Goyal H, Awad HH, Ghali JK. Role of cannabis in cardiovascular disorders. *J Thorac Dis*.  
49  
50 2017;9(7):2079-2092. doi:10.21037/jtd.2017.06.104  
51  
52  
53  
54  
55  
56  
57  
58  
59  
60

**Table 1.** Descriptive characteristics of socio-demographics, lifestyles, ongoing treatment, and health perception (n=629)

|                                                     |                                                   | n     | %     |
|-----------------------------------------------------|---------------------------------------------------|-------|-------|
| <b>Socio-demographic characteristics</b>            | <i>Sex</i>                                        |       |       |
|                                                     | Male                                              | 290   | 46.1  |
|                                                     | Female                                            | 339   | 53.9  |
|                                                     | <i>Provenience</i>                                |       |       |
|                                                     | Northern Italy                                    | 231   | 36.9% |
|                                                     | Central Italy                                     | 223   | 35.6% |
|                                                     | Southern Italy                                    | 172   | 27.5% |
|                                                     | <i>Age</i>                                        |       |       |
|                                                     | Years (mean; standard deviation; range: 18-57)    | 35.69 | 13.49 |
|                                                     | <i>Body Mass Index (BMI)</i>                      |       |       |
|                                                     | Kg/m <sup>2</sup> (mean; standard deviation)      | 23.18 | 4.07  |
|                                                     | Underweight (BMI < 18.5 Kg/m <sup>2</sup> )       | 68    | 10.9  |
|                                                     | Normal weight (BMI: 18.5-24.9 Kg/m <sup>2</sup> ) | 373   | 59.4  |
|                                                     | Overweight (BMI: 25-29.9 Kg/m <sup>2</sup> )      | 145   | 23    |
|                                                     | Obese (BMI > 30 Kg/m <sup>2</sup> )               | 42    | 6.7   |
|                                                     | <i>Offspring</i>                                  |       |       |
|                                                     | Yes                                               | 208   | 33.2  |
|                                                     | <i>Education</i>                                  |       |       |
|                                                     | Lower or equal to high school                     | 490   | 78.3  |
|                                                     | University education                              | 136   | 21.7  |
|                                                     | <i>Occupation</i>                                 |       |       |
| Manager                                             | 32                                                | 5.1   |       |
| Office worker                                       | 263                                               | 42.0  |       |
| Student                                             | 113                                               | 18.1  |       |
| Freelance                                           | 84                                                | 13.4  |       |
| Unemployed                                          | 110                                               | 17.6  |       |
| Retired                                             | 25                                                | 3.8   |       |
| <b>Lifestyles</b>                                   | <i>Smoking</i>                                    |       |       |
|                                                     | Yes                                               | 65    | 10.4  |
|                                                     | <i>Illicit Drugs</i>                              |       |       |
|                                                     | Occasionally                                      | 81    | 12.9  |
|                                                     | Cannabis (occasionally consumer)                  | 77    | 12.3  |
|                                                     | Cocaine (occasionally consumer)                   | 2     | 0.3   |
|                                                     | <i>Regular physical activities</i>                |       |       |
|                                                     | Yes                                               | 325   | 52.1  |
|                                                     | On daily basis                                    | 53    | 8.5   |
|                                                     | Two-three times per week                          | 247   | 39.4  |
|                                                     | Once per week                                     | 40    | 6.4   |
| <i>Reasons to avoid regular physical activities</i> |                                                   |       |       |
| Ill-judged                                          | 21                                                | 3.4   |       |
| Lack of willing                                     | 139                                               | 22.2  |       |
| Lack of energy                                      | 50                                                | 7.9   |       |
| Fear                                                | 93                                                | 14.8  |       |



1  
2  
3  
4  
5  
6  
7  
8  
9  
10  
11  
12  
13  
14  
15  
16  
17  
18  
19  
20  
21  
22  
23  
24  
25  
26  
27  
28  
29  
30  
31  
32  
33  
34  
35  
36  
37  
38  
39  
40  
41  
42  
43  
44  
45  
46  
47  
48  
49  
50  
51  
52  
53  
54  
55  
56  
57  
58  
59  
60

|                                                         |                                  |       |       |
|---------------------------------------------------------|----------------------------------|-------|-------|
| <hr/>                                                   |                                  |       |       |
| <i>Daily time spent walking</i>                         |                                  |       |       |
|                                                         | Less than 30 minutes             | 285   | 45.5  |
|                                                         | Between 30 and 60 minutes        | 340   | 54.3  |
|                                                         | More than 60 minutes             | 154   | 24.6  |
| <i>Perception of adequate daily physical activities</i> |                                  |       |       |
|                                                         | Yes                              | 285   | 45.5  |
| <i>Sexuality education</i>                              |                                  |       |       |
|                                                         | Never received                   | 6     | 0.9   |
|                                                         | Poorly received                  | 21    | 3.5   |
|                                                         | Sufficiently received            | 122   | 19.5  |
|                                                         | Adequately received              | 477   | 76.1  |
| <i>Contraceptive</i>                                    |                                  |       |       |
|                                                         | Yes                              | 238   | 40.5  |
| <i>Low adherent to the ongoing medical treatment</i>    |                                  |       |       |
|                                                         | Yes                              | 106   | 18.1  |
| <hr/>                                                   |                                  |       |       |
| <i>Medical therapy</i>                                  |                                  |       |       |
| <b>Ongoing Treatment</b>                                | Diuretics                        | 104   | 16.6  |
|                                                         | Antiarrhythmic therapy           | 121   | 19.3  |
|                                                         | Anticoagulants                   | 162   | 25.9  |
|                                                         | Antiplatelet                     | 87    | 13.9  |
|                                                         | Antihypertensive therapy         | 81    | 12.9  |
|                                                         | Dietary supplements              | 160   | 25.6  |
| <hr/>                                                   |                                  |       |       |
| <i>Physical Health</i>                                  |                                  |       |       |
| <b>Health perception</b>                                | Score (mean; standard deviation) | 48.69 | 8.96  |
|                                                         | <i>Mental Health</i>             |       |       |
|                                                         | Score (mean; standard deviation) | 45.56 | 10.99 |
|                                                         | Adequate physical health (Yes)*  | 337   | 53.6  |
|                                                         | Adequate mental health (Yes)*    | 401   | 63.8  |
| <hr/>                                                   |                                  |       |       |

*Note: (\*) Adequate physical and mental health were calculated using the median split, based on the Italian median scores of the study of the IQOLA Project (median score of physical health in general population was equal to 52.5; median score of mental health was equal to 51.2).*

**Table 2.** Determinants of inadequate scores of PCS12 (outcome)

|                       | Wald's $\chi^2$ | d.f. | P     | e <sup>b</sup>                                | 95%CI        |              |
|-----------------------|-----------------|------|-------|-----------------------------------------------|--------------|--------------|
| <b>Predictor</b>      |                 |      |       |                                               |              |              |
| Constant              | 15.21           | 1    | 0.000 |                                               |              |              |
| Age                   | 1.382           | 1    | 0.24  | 0.991                                         | 0.976        | 1.006        |
| BMI                   | 0.134           | 1    | 0.714 | 0.991                                         | 0.946        | 1.039        |
| Diuretics             | 2.658           | 1    | 0.103 | 1.576                                         | 0.912        | 2.725        |
| Antiarrhythmic        | 6.951           | 1    | 0.008 | <b>2.045</b>                                  | <b>1.201</b> | <b>3.479</b> |
| Anticoagulants        | 4.499           | 1    | 0.034 | <b>1.638</b>                                  | <b>1.038</b> | <b>2.585</b> |
| Antiplatelet          | 4.197           | 1    | 0.041 | <b>1.743</b>                                  | <b>1.024</b> | <b>2.966</b> |
| Antihypertensive      | 2.198           | 1    | 0.138 | 1.546                                         | 0.869        | 2.75         |
| <b>Model fit</b>      |                 |      |       |                                               |              |              |
|                       | $\chi^2$        | d.f. | P     | Pseudo- <i>R</i> <sup>2</sup><br>(Nagelkerke) |              |              |
| Likelihood ratio test | 16.3            | 9    | 0.049 | 0.236                                         |              |              |

**Table 3.** Determinants of inadequate scores of MCS12 (outcome)

|                       | Wald's $\chi^2$ | d.f. | P     | e <sup>b</sup>                        | 95%CI        |              |
|-----------------------|-----------------|------|-------|---------------------------------------|--------------|--------------|
| <b>Predictor</b>      |                 |      |       |                                       |              |              |
| Constant              | 1.437           | 1    | 0.231 |                                       |              |              |
| Age                   | 5.038           | 1    | 0.025 | <b>1.017</b>                          | <b>1.002</b> | <b>1.032</b> |
| BMI                   | 1.784           | 1    | 0.182 | 0.968                                 | 0.924        | 1.015        |
| Diuretics             | 0.248           | 1    | 0.619 | 1.142                                 | 0.677        | 1.925        |
| Antiarrhythmic        | 0.683           | 1    | 0.409 | 1.241                                 | 0.744        | 2.070        |
| Anticoagulants        | 0.462           | 1    | 0.497 | 1.170                                 | 0.744        | 1.838        |
| Antiplatelet          | 0.019           | 1    | 0.891 | 0.965                                 | 0.581        | 1.603        |
| Antihypertensive      | 0.012           | 1    | 0.913 | 1.031                                 | 0.595        | 1.787        |
| <b>Model fit</b>      |                 |      |       |                                       |              |              |
|                       | $\chi^2$        | d.f. | P     | Pseudo-R <sup>2</sup><br>(Nagelkerke) |              |              |
| Likelihood ratio test | 16.3            | 9    | 0.049 | 0.135                                 |              |              |

STROBE Statement—Checklist of items that should be included in reports of *cross-sectional studies*

|                              | Item No                                                                            | Recommendation                                                                                                                                                                                               | Page No |
|------------------------------|------------------------------------------------------------------------------------|--------------------------------------------------------------------------------------------------------------------------------------------------------------------------------------------------------------|---------|
| <b>Title and abstract</b>    | 1                                                                                  | (a) Indicate the study's design with a commonly used term in the title or the abstract                                                                                                                       | 1-2     |
|                              |                                                                                    | (b) Provide in the abstract an informative and balanced summary of what was done and what was found                                                                                                          | 1-2     |
| <b>Introduction</b>          |                                                                                    |                                                                                                                                                                                                              |         |
| Background/rationale         | 2                                                                                  | Explain the scientific background and rationale for the investigation being reported                                                                                                                         | 4       |
| Objectives                   | 3                                                                                  | State specific objectives, including any prespecified hypotheses                                                                                                                                             | 4       |
| <b>Methods</b>               |                                                                                    |                                                                                                                                                                                                              |         |
| Study design                 | 4                                                                                  | Present key elements of study design early in the paper                                                                                                                                                      | 5       |
| Setting                      | 5                                                                                  | Describe the setting, locations, and relevant dates, including periods of recruitment, exposure, follow-up, and data collection                                                                              | 5-6     |
| Participants                 | 6                                                                                  | (a) Give the eligibility criteria, and the sources and methods of selection of participants                                                                                                                  | 5-6     |
| Variables                    | 7                                                                                  | Clearly define all outcomes, exposures, predictors, potential confounders, and effect modifiers. Give diagnostic criteria, if applicable                                                                     | 5-6     |
| Data sources/<br>measurement | 8*                                                                                 | For each variable of interest, give sources of data and details of methods of assessment (measurement). Describe comparability of assessment methods if there is more than one group                         | 5-6     |
| Bias                         | 9                                                                                  | Describe any efforts to address potential sources of bias                                                                                                                                                    | 6-7     |
| Study size                   | 10                                                                                 | Explain how the study size was arrived at                                                                                                                                                                    | 6       |
| Quantitative variables       | 11                                                                                 | Explain how quantitative variables were handled in the analyses. If applicable, describe which groupings were chosen and why                                                                                 | 5-6     |
| Statistical methods          | 12                                                                                 | (a) Describe all statistical methods, including those used to control for confounding                                                                                                                        | 6-7     |
|                              |                                                                                    | (b) Describe any methods used to examine subgroups and interactions                                                                                                                                          | 6-7     |
|                              | (c) Explain how missing data were addressed                                        | 6-7                                                                                                                                                                                                          |         |
|                              | (d) If applicable, describe analytical methods taking account of sampling strategy | na                                                                                                                                                                                                           |         |
|                              | (e) Describe any sensitivity analyses                                              | na                                                                                                                                                                                                           |         |
| <b>Results</b>               |                                                                                    |                                                                                                                                                                                                              |         |
| Participants                 | 13*                                                                                | (a) Report numbers of individuals at each stage of study—eg numbers potentially eligible, examined for eligibility, confirmed eligible, included in the study, completing follow-up, and analysed            | 8       |
|                              |                                                                                    | (b) Give reasons for non-participation at each stage                                                                                                                                                         | na      |
|                              |                                                                                    | (c) Consider use of a flow diagram                                                                                                                                                                           | na      |
| Descriptive data             | 14*                                                                                | (a) Give characteristics of study participants (eg demographic, clinical, social) and information on exposures and potential confounders                                                                     | 8       |
|                              |                                                                                    | (b) Indicate number of participants with missing data for each variable of interest                                                                                                                          | 8       |
| Outcome data                 | 15*                                                                                | Report numbers of outcome events or summary measures                                                                                                                                                         | 8       |
| Main results                 | 16                                                                                 | (a) Give unadjusted estimates and, if applicable, confounder-adjusted estimates and their precision (eg, 95% confidence interval). Make clear which confounders were adjusted for and why they were included | 8       |

|                          |    |                                                                                                                                                                            |     |
|--------------------------|----|----------------------------------------------------------------------------------------------------------------------------------------------------------------------------|-----|
|                          |    | (b) Report category boundaries when continuous variables were categorized                                                                                                  | na  |
|                          |    | (c) If relevant, consider translating estimates of relative risk into absolute risk for a meaningful time period                                                           | na  |
| Other analyses           | 17 | Report other analyses done—eg analyses of subgroups and interactions, and sensitivity analyses                                                                             | na  |
| <b>Discussion</b>        |    |                                                                                                                                                                            |     |
| Key results              | 18 | Summarise key results with reference to study objectives                                                                                                                   | 8-9 |
| Limitations              | 19 | Discuss limitations of the study, taking into account sources of potential bias or imprecision. Discuss both direction and magnitude of any potential bias                 | 9   |
| Interpretation           | 20 | Give a cautious overall interpretation of results considering objectives, limitations, multiplicity of analyses, results from similar studies, and other relevant evidence | 9   |
| Generalisability         | 21 | Discuss the generalisability (external validity) of the study results                                                                                                      | 9   |
| <b>Other information</b> |    |                                                                                                                                                                            |     |
| Funding                  | 22 | Give the source of funding and the role of the funders for the present study and, if applicable, for the original study on which the present article is based              | 11  |

\*Give information separately for exposed and unexposed groups.

**Note:** An Explanation and Elaboration article discusses each checklist item and gives methodological background and published examples of transparent reporting. The STROBE checklist is best used in conjunction with this article (freely available on the Web sites of PLoS Medicine at <http://www.plosmedicine.org/>, Annals of Internal Medicine at <http://www.annals.org/>, and Epidemiology at <http://www.epidem.com/>). Information on the STROBE Initiative is available at [www.strobe-statement.org](http://www.strobe-statement.org).

## Sondaggio AICCA

**Grazie per aver deciso di partecipare a questo sondaggio, di seguito troverà una serie di domande di facile comprensione. Il suo supporto e il suo tempo sono fondamentali ai fini della ricerca.**

### 1. Sesso

- Maschio
- Femmina

### 2. Età

### 3. Con chi vive?

- Solo
- Con i genitori
- Con la famiglia
- Altro (specificare)

### 4. Ha figli?

- Sì
- No

### 5. Se Sì, quanti?

### 6. Titolo di studio

- Dottorato di ricerca o specializzazione post laurea
- Laurea/Diploma universitario
- Diploma scuola media superiore
- Licenza scuola media inferiore
- Licenza elementare

1  
2  
3  
4  
5  
6  
7  
8  
9  
10  
11  
12  
13  
14  
15  
16  
17  
18  
19  
20  
21  
22  
23  
24  
25  
26  
27  
28  
29  
30  
31  
32  
33  
34  
35  
36  
37  
38  
39  
40  
41  
42  
43  
44  
45  
46  
47  
48  
49  
50  
51  
52  
53  
54  
55  
56  
57  
58  
59  
60  

### 7. Professione

- Direttivo, quadro
- Impiegato, intermedio
- Capo operaio, operaio subalterno
- Apprendista
- Libero professionista
- Disoccupato
- Altro (specificare)

### 8. Ha un credo religioso?

- Sì
- No

### 9. Se Sì, quale?

- Cristiano-cattolico
- Cristiano-protestante
- Ebraico
- Musulmano
- Altro (specificare)

1  
2  
3  
4 **Le informazioni delle prossime tre domande devono riferirsi a misurazioni prese dal medico curante**  
5

6 10. Peso (solo una risposta)  
7

8 Rilevato senza vestiti in Kg

9  
10 Rilevato con i vestiti in Kg

11  
12  
13 11. Altezza in cm  
14

15

16  
17  
18 12. Quanto misura la sua circonferenza addominale in cm? (misurata senza vestiti con un metro da sarta a  
19 livello dell'ombelico senza trattenere il respiro)  
20

21



1  
2  
3 13. Lei fuma?  
4

5  Sì

6  No  
7  
8  
9

10 14. Se sì, quante sigarette fuma al giorno?

11  Meno di 5 sigarette al giorno

12  Da 5 a 9 sigarette al giorno

13  Da 10 a 14 sigarette al giorno

14  Da 15 a 19 sigarette al giorno

15  Da 20 a 24 sigarette al giorno

16 25 sigarette al giorno o più  
17  
18  
19  
20  
21  
22

23 15. Se sì, ha mai cercato di smettere di fumare?  
24

25  Sì

26  No  
27  
28  
29

30 16. Ha mai fatto uso di droghe?  
31

32  No

33  1 sola volta

34  Saltuariamente

35  Con regolarità  
36  
37  
38  
39

40 17. Se sì, che tipo di droghe?  
41

42  Cannabis

43  Cocaina

44  Metanfetamine

45  Eroina

46  Altro (specificare)  
47  
48  
49  
50

51   
52  
53  
54  
55  
56  
57  
58  
59  
60

1  
2  
3  
4  
5 18. Pratica regolarmente attività fisica?  
6

7  Sì

8  No  
9

10  
11  
12 19. Se sì, che tipo di attività fisica svolge?  
13

14 (possibile dare più di una risposta)  
15

16  Corsa

17  Passeggiate all'aria aperta

18  Calcio o calcetto

19  Palestra

20  Piscina

21  Bicicletta

22  Altro (specificare)  
23  
24  
25  
26  
27  
28

29   
30  
31

32 20. Se pratica attività fisica, quanti giorni a settimana?  
33

34  Tutti i giorni della settimana

35  Alcuni giorni (indicare il numero nella casella sottostante)

36  Solo il fine settimana  
37  
38  
39

40 Se ha indicato "alcuni giorni", specifichi in numero

41   
42  
43

44 21. Se pratica attività fisica, ogni volta che la fa per quante ore?  
45

46  Meno di un'ora

47  Un'ora

48  Due ore

49  Più di due ore  
50  
51  
52  
53  
54  
55  
56  
57  
58  
59  
60

1  
2  
3 22. Se non pratica attività fisica, ci indichi il perché

- 4  Sconsigliato  
5  
6  Mancanza di voglia  
7  
8  Non ce la faccio  
9  
10  Ho paura  
11  
12  Altro (specificare)

13

14

15

16 23. Se le è stata sconsigliata l'attività fisica, da chi?

- 17  
18  Medico di base  
19  
20  Cardiologo  
21  
22  Familiari  
23  
24  Altro (specificare)

25

26

27

28

29

30

31

32

33

34

35

36

37

38

39

40

41

42

43

44

45

46

47

48

49

50

51

52

53

54

55

56

57

58

59

60

1  
2  
3  
4  
5 24. Dopo un ricovero in ospedale ha mai fatto un periodo in un centro di riabilitazione?  
6

7 Si

8 No  
9  
10

11  
12 25. Se Sì, lo ha trovato utile?  
13

14 Si

15 No  
16  
17

18  
19 26. Se no, pensa che sarebbe stato utile?  
20

21 Si

22 No  
23  
24

25  
26 27. Se no, per quale motivo?  
27

28 Non le è stato proposto

29 Le è stato proposto, ma ha rifiutato

30 Altro (specificare)  
31  
32  
33  
34  
35  
36  
37

38 28. Calcolando tutti i suoi spostamenti a piedi, per quanto tempo ritiene di camminare al giorno?  
39

40 Meno di 30 minuti

41 Dai 30 a 60 minuti

42 Più di 60 minuti  
43  
44  
45  
46  
47  
48  
49  
50  
51  
52  
53  
54  
55  
56  
57  
58  
59  
60

1 29. Secondo Lei fa abbastanza movimento durante il giorno?  
2

3  Sì

4  No  
5  
6  
7

8 30. Durante la cena, solitamente assume  
9

10 (possibile dare più di una risposta)  
11

12  Un primo

13  Un secondo

14  Un contorno

15  Pane

16  Dolce

17  Frutta

18  Niente

19  Panino / Tramezzino

20  Pizza / Piadina/Focaccia

21  Acqua

22  Vino

23  Birra

24  Caffè

25  Altro (specificare)  
26  
27  
28  
29  
30  
31  
32  
33  
34  
35  
36  
37

38   
39  
40

41 31. Lei normalmente beve acqua  
42

43  Proveniente dal rubinetto

44  Imbottigliata  
45  
46  
47

48 32. Quanti litri d'acqua beve al giorno?  
49

50  Mezzo litro

51  Un litro

52  Due o più litri  
53  
54  
55  
56  
57  
58  
59  
60

1  
2  
3 33. Assume bevande zuccherate per più di 3 volte alla settimana?

4  Sì

5  No

6  
7  
8  
9  
10  
11 34. Assume bevande alcoliche?

12

13 Sì

14 No

15  
16  
17  
18 35. Se Sì, tutti i giorni della settimana?

19

20 Sì

21

22 No

23  
24 36. Se assume bevande alcoliche, quali delle seguenti assume durante la giornata (pranzo+cena)?

25  
26  
27

|                                                    | 1                     | 2                     | 3                     | Più di 3              |
|----------------------------------------------------|-----------------------|-----------------------|-----------------------|-----------------------|
| 28 Birra (unità di misura =<br>29 Bottiglia 33 cl) | <input type="radio"/> | <input type="radio"/> | <input type="radio"/> | <input type="radio"/> |

30  
31  
32

|                                                    |                       |                       |                       |                       |
|----------------------------------------------------|-----------------------|-----------------------|-----------------------|-----------------------|
| 31 Vino (unità di misura<br>32 = Bicchiere 125 ml) | <input type="radio"/> | <input type="radio"/> | <input type="radio"/> | <input type="radio"/> |
|----------------------------------------------------|-----------------------|-----------------------|-----------------------|-----------------------|

33  
34  
35  
36

|                                                                  |                       |                       |                       |                       |
|------------------------------------------------------------------|-----------------------|-----------------------|-----------------------|-----------------------|
| 34 Superalcolico (unità di<br>35 misura = Bicchiere 40<br>36 ml) | <input type="radio"/> | <input type="radio"/> | <input type="radio"/> | <input type="radio"/> |
|------------------------------------------------------------------|-----------------------|-----------------------|-----------------------|-----------------------|

37  
38  
39  
40

|                                                                      |                       |                       |                       |                       |
|----------------------------------------------------------------------|-----------------------|-----------------------|-----------------------|-----------------------|
| 37 Cocktail alcolico (unità<br>38 di misura = Bicchiere 40<br>39 ml) | <input type="radio"/> | <input type="radio"/> | <input type="radio"/> | <input type="radio"/> |
|----------------------------------------------------------------------|-----------------------|-----------------------|-----------------------|-----------------------|

41  
42  
43

|                        |                       |                       |                       |                       |
|------------------------|-----------------------|-----------------------|-----------------------|-----------------------|
| 42 Altro (specificare) | <input type="radio"/> | <input type="radio"/> | <input type="radio"/> | <input type="radio"/> |
|------------------------|-----------------------|-----------------------|-----------------------|-----------------------|

44  
45  
46  
47 37. Lei ha mai pensato che il suo consumo di alcol fosse eccessivo?

48  Sì

49  No

50  
51  
52  
53  
54  
55  
56  
57  
58  
59  
60

1  
2  
3  
4  
5 **38. La sera Lei generalmente**

6 Esce

7  
8 Rimane a casa (a vedere la tv, leggere, etc.)  
9

10  
11  
12 **39. Se esce, le capita di bere...**

13 Niente

14 Birra

15  
16  
17 Vino

18  
19 Bevanda analcolica

20  
21 Superalcolico

22  
23 Cocktail alcolico

24  
25 Altro (specificare)  
26  
27  
28  
29  
30  
31  
32  
33  
34  
35  
36  
37  
38  
39  
40  
41  
42  
43  
44  
45  
46  
47  
48  
49  
50  
51  
52  
53  
54  
55  
56  
57  
58  
59  
60

1  
2  
3  
4  
5 40. Quanto crede di essere informato sulla sessualità?

- 6  Molto  
7  
8  Abbastanza  
9  
10  Sufficientemente  
11  
12  Poco  
13  
14  Per nulla  
15

16  
17  
18 41. Come definirebbe la Sua vita sessuale?

- 19  Intensa  
20  
21  Buona  
22  
23  Sufficiente  
24  
25  Scarsa  
26  
27  Nulla  
28

29  
30 42. Se scarsa o nulla, quali sono le cause?

- 31  Mancanza di un partner  
32  
33  Inesperienza / Incapacità  
34  
35  Paura legata alla cardiopatia  
36  
37  Non è importante per me  
38  
39  Altro (specificare)  
40

41

42  
43  
44 43. Fa uso di anticoncezionali?

- 45  Sì  
46  
47  No  
48  
49  
50  
51  
52  
53  
54  
55  
56  
57  
58  
59  
60



1 44. Se si quali?

2  Condom (preservativo)

3  Pillola

4  Diaframma

5  Altro (specificare)

6  
7  
8  
9  
10

11  
12  
13 45. Assume regolarmente farmaci?

14  Sì

15  No

16  
17  
18  
19  
20 46. Se Sì, quali farmaci?

21 **(possibile più di una risposta)**

22  Diuretici

23  Antiaritmici

24  Anticoagulanti

25  Aspirina

26  Antipertensivi

27  Altro (specificare)

28  
29  
30  
31  
32  
33  
34  
35  
36

37  
38  
39 47. Fa uso dei seguenti prodotti?

40

|                | Sì                    | No                    |
|----------------|-----------------------|-----------------------|
| 41 Integratori | <input type="radio"/> | <input type="radio"/> |
| 42             |                       |                       |
| 43             |                       |                       |
| 44             |                       |                       |
| 45             |                       |                       |
| 46             |                       |                       |
| 47             |                       |                       |
| 48             |                       |                       |
| 49             |                       |                       |
| 50             |                       |                       |
| 51             |                       |                       |
| 52             |                       |                       |
| 53             |                       |                       |
| 54             |                       |                       |
| 55             |                       |                       |
| 56             |                       |                       |
| 57             |                       |                       |
| 58             |                       |                       |
| 59             |                       |                       |
| 60             |                       |                       |

48 48. Si è mai dimenticato di assumere i farmaci?

49  Sì

50  No

1 49. E' occasionalmente poco attento nell'assunzione dei farmaci?  
2

3 Si

4 No  
5  
6  
7

8 50. Quando si sente meglio, a volte interrompe la terapia?  
9

10 Si

11 No  
12  
13

14 51. Quando si sente peggio, a volte interrompe la terapia?  
15

16 Si

17 No  
18  
19  
20

21 52. In generale, direbbe che la sua salute è  
22

23 Eccellente

24 Molto buona

25 Buona

26 Passabile

27 Scadente  
28  
29  
30  
31  
32  
33  
34  
35  
36  
37  
38  
39  
40  
41  
42  
43  
44  
45  
46  
47  
48  
49  
50  
51  
52  
53  
54  
55  
56  
57  
58  
59  
60
