# Supplementary material for: Lifestyles and determinants of perceived health in Italian grown-up/adult congenital heart patients: a cross-sectional and pan-national survey
Source: PubMed Central journal article supplement — BMJ Open. 2019 Oct 18;9(10):e030917. doi: 10.1136/bmjopen-2019-030917 (PMC6803081; doi:10.1136/bmjopen-2019-030917), 2019-10-18
Supplement: bmjopen-2019-030917supp002.pdf [file bmjopen-2019-030917supp002.pdf]

## Sondaggio AICCA

**Grazie per aver deciso di partecipare a questo sondaggio, di seguito troverà una serie di domande di facile comprensione. Il suo supporto e il suo tempo sono fondamentali ai fini della ricerca.**

### 1. Sesso

- Maschio
- Femmina

### 2. Età

### 3. Con chi vive?

- Solo
- Con i genitori
- Con la famiglia
- Altro (specificare)

### 4. Ha figli?

- Sì
- No

### 5. Se Sì, quanti?

### 6. Titolo di studio

- Dottorato di ricerca o specializzazione post laurea
- Laurea/Diploma universitario
- Diploma scuola media superiore
- Licenza scuola media inferiore
- Licenza elementare

**7. Professione**

- Direttivo, quadro
- Impiegato, intermedio
- Capo operaio, operaio subalterno
- Apprendista
- Liberoprofessionista
- Disoccupato
- Altro (specificare)

**8. Ha un credo religioso?**

- Sì
- No

**9. Se Sì, quale?**

- Cristiano-cattolico
- Cristiano-protestante
- Ebraico
- Musulmano
- Altro (specificare)

**Le informazioni delle prossime tre domande devono riferirsi a misurazioni prese dal medico curante****10. Peso (solo una risposta)**Rilevato senza vestiti in Kg Rilevato con i vestiti in Kg **11. Altezza in cm****12. Quanto misura la sua circonferenza addominale in cm? (misurata senza vestiti con un metro da sarta a livello dell'ombelico senza trattenere il respiro)**

13. Lei fuma?

Sì

No

14. Se sì, quante sigarette fuma al giorno?

Meno di 5 sigarette al giorno

Da 5 a 9 sigarette al giorno

Da 10 a 14 sigarette al giorno

Da 15 a 19 sigarette al giorno

Da 20 a 24 sigarette al giorno

25 sigarette al giorno o più

15. Se sì, ha mai cercato di smettere di fumare?

Sì

No

16. Ha mai fatto uso di droghe?

No

1 sola volta

Saltuariamente

Con regolarità

17. Se sì, che tipo di droghe?

Cannabis

Cocaina

Metanfetamine

Eroina

Altro (specificare)

18. Pratica regolarmente attività fisica?

Sì

No

19. Se sì, che tipo di attività fisica svolge?

(possibile dare più di una risposta)

Corsa

Passeggiate all'aria aperta

Calcio o calcetto

Palestra

Piscina

Bicicletta

Altro (specificare)

20. Se pratica attività fisica, quanti giorni a settimana?

Tutti i giorni della settimana

Alcuni giorni (indicare il numero nella casella sottostante)

Solo il fine settimana

Se ha indicato "alcuni giorni", specifichi in numero

21. Se pratica attività fisica, ogni volta che la fa per quante ore?

Meno di un'ora

Un'ora

Due ore

Più di due ore

22. Se non pratica attività fisica, ci indichi il perché

- Sconsigliato
- Mancanza di voglia
- Non ce la faccio
- Ho paura
- Altro (specificare)

23. Se le è stata sconsigliata l'attività fisica, da chi?

- Medico di base
- Cardiologo
- Familiari
- Altro (specificare)

24. Dopo un ricovero in ospedale ha mai fatto un periodo in un centro di riabilitazione?

Si

No

25. Se Sì, lo ha trovato utile?

Si

No

26. Se no, pensa che sarebbe stato utile?

Si

No

27. Se no, per quale motivo?

Non le è stato proposto

Le è stato proposto, ma ha rifiutato

Altro (specificare)

28. Calcolando tutti i suoi spostamenti a piedi, per quanto tempo ritiene di camminare al giorno?

Meno di 30 minuti

Dai 30 a 60 minuti

Più di 60 minuti

29. Secondo Lei fa abbastanza movimento durante il giorno?

Sì

No

30. Durante la cena, solitamente assume

(possibile dare più di una risposta)

Un primo

Un secondo

Un contorno

Pane

Dolce

Frutta

Niente

Panino / Tramezzino

Pizza / Piadina/ Focaccia

Acqua

Vino

Birra

Caffè

Altro (specificare)

31. Lei normalmente beve acqua

Proveniente dal rubinetto

Imbottigliata

32. Quanti litri d'acqua beve al giorno?

Mezzo litro

Un litro

Due o più litri



33. Assume bevande zuccherate per più di 3 volte alla settimana?

- Sì  
 No

34. Assume bevande alcoliche?

- Sì  
 No

35. Se Sì, tutti i giorni della settimana?

- |    |                       |                       |                       |                       |
|----|-----------------------|-----------------------|-----------------------|-----------------------|
| Sì | <input type="radio"/> | <input type="radio"/> | <input type="radio"/> | <input type="radio"/> |
| No | <input type="radio"/> | <input type="radio"/> | <input type="radio"/> | <input type="radio"/> |

36. Se assume bevande alcoliche, quali delle seguenti assume durante la giornata (pranzo+cena)?

- |                                                             | 1                     | 2                     | 3                     | Più di 3              |
|-------------------------------------------------------------|-----------------------|-----------------------|-----------------------|-----------------------|
| Birra (unità di misura =<br>Bottiglia 33 cl)                | <input type="radio"/> | <input type="radio"/> | <input type="radio"/> | <input type="radio"/> |
| Vino (unità di misura<br>= Bicchiere 125 ml)                | <input type="radio"/> | <input type="radio"/> | <input type="radio"/> | <input type="radio"/> |
| Superalcolico (unità di<br>misura = Bicchiere 40<br>ml)     | <input type="radio"/> | <input type="radio"/> | <input type="radio"/> | <input type="radio"/> |
| Cocktail alcolico (unità<br>di misura = Bicchiere 40<br>ml) | <input type="radio"/> | <input type="radio"/> | <input type="radio"/> | <input type="radio"/> |
| Altro (specificare)                                         | <input type="radio"/> | <input type="radio"/> | <input type="radio"/> | <input type="radio"/> |

37. Lei ha mai pensato che il suo consumo di alcol fosse eccessivo?

- Sì  
 No

38. La sera Lei generalmente

Esce

Rimane a casa (a vedere la tv, leggere, etc.)

39. Se esce, le capita di bere...

Niente

Birra

Vino

Bevanda analcolica

Superalcolico

Cocktail alcolico

Altro (specificare)

40. Quanto crede di essere informato sulla sessualità?

- Molto
- Abbastanza
- Sufficientemente
- Poco
- Per nulla

41. Come definirebbe la Sua vita sessuale?

- Intensa
- Buona
- Sufficiente
- Scarsa
- Nulla

42. Se scarsa o nulla, quali sono le cause?

- Mancanza di un partner
- Inesperienza / Incapacità
- Paura legata alla cardiopatia
- Non è importante per me
- Altro (specificare)

43. Fa uso di anticoncezionali?

- Sì
- No

44. Se si quali?

- Condom (preservativo)
- Pillola
- Diaframma
- Altro (specificare)

45. Assume regolarmente farmaci?

- Sì
- No

46. Se Sì, quali farmaci?

**(possibile più di una risposta)**

- Diuretici
- Antiaritmici
- Anticoagulanti
- Aspirina
- Antipertensivi
- Altro (specificare)

47. Fa uso dei seguenti prodotti?

|                          | Sì                    | No                    |
|--------------------------|-----------------------|-----------------------|
| Integratori              | <input type="radio"/> | <input type="radio"/> |
| Prodotti di erboristeria | <input type="radio"/> | <input type="radio"/> |

48. Si è mai dimenticato di assumere i farmaci?

- Sì
- No

49. E' occasionalmente poco attento nell'assunzione dei farmaci?

Si

No

50. Quando si sente meglio, a volte interrompe la terapia?

Si

No

51. Quando si sente peggio, a volte interrompe la terapia?

Si

No

52. In generale, direbbe che la sua salute è

Eccellente

Molto buona

Buona

Passabile

Scadente
